# Supplementary figures and images for: Comparative Transcriptome Analysis Reveals the Molecular Basis of Brassica napus in Response to Aphid Stress
Source: MDPI journal article supplement (doi:10.3390/plants12152855), 2023-08-03

(A)

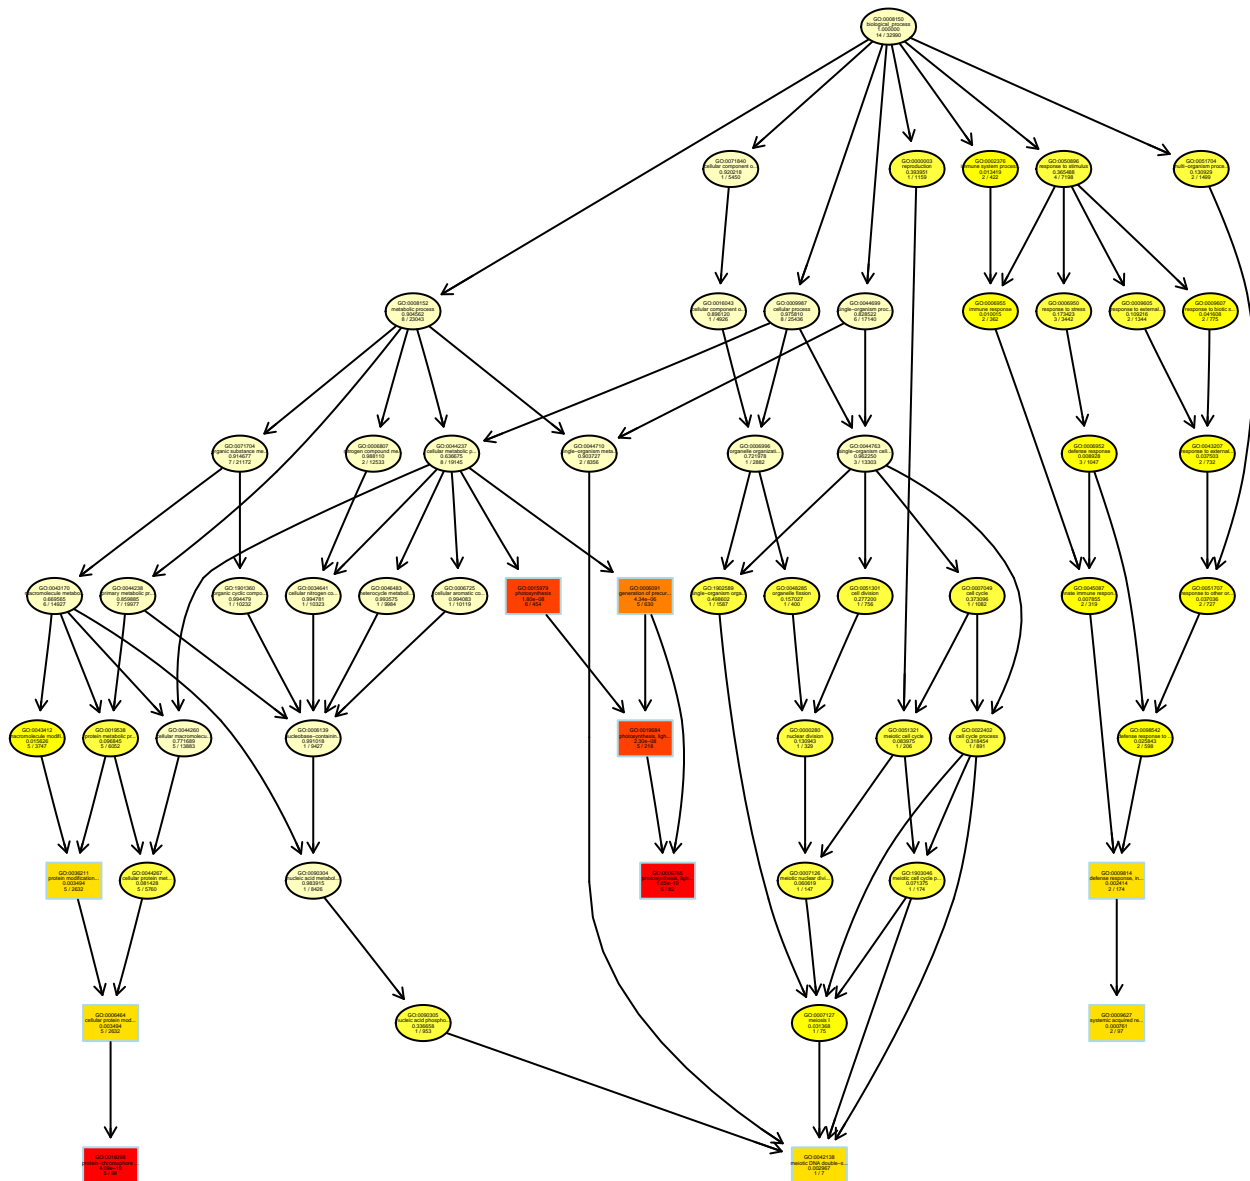

(B)

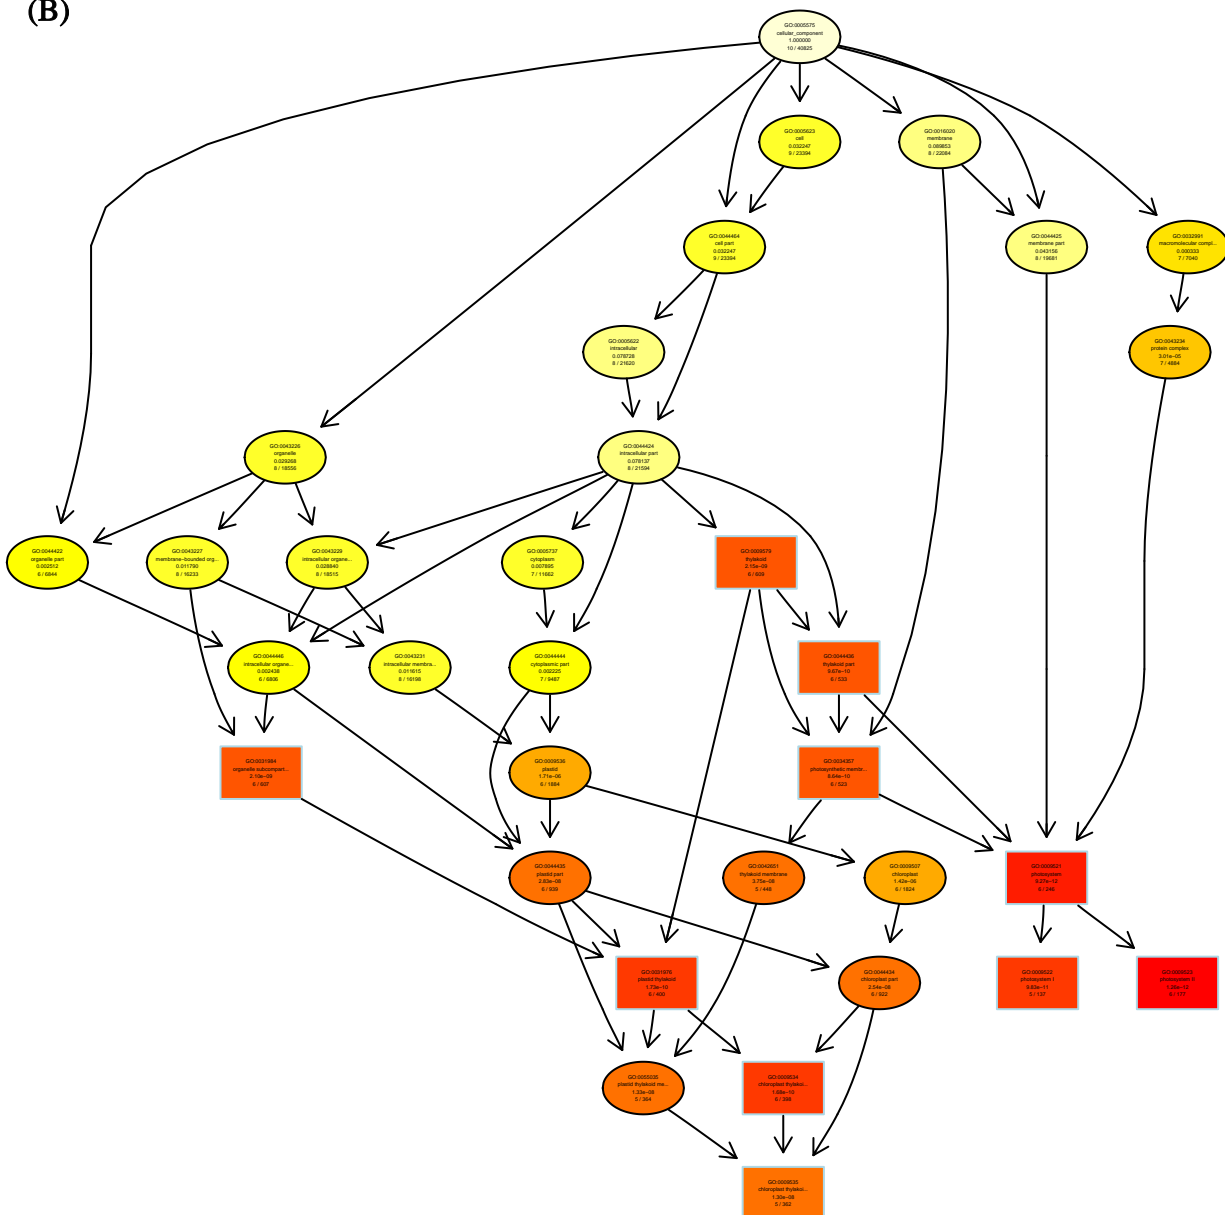

(C)

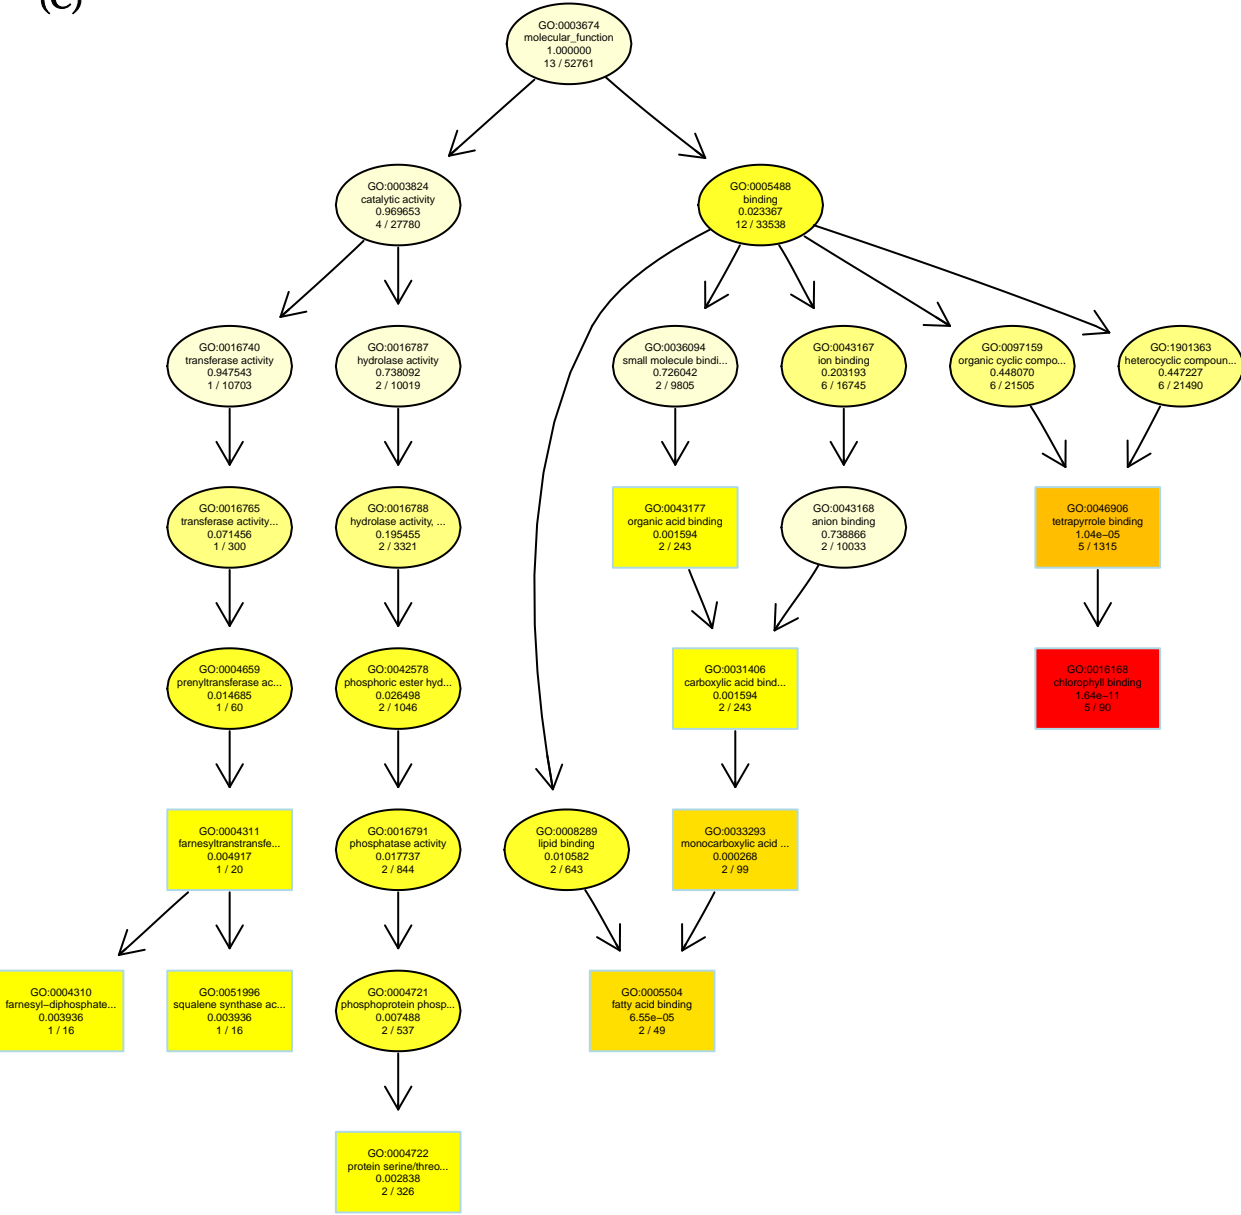

Supplement: s1 [file s1]

(A)

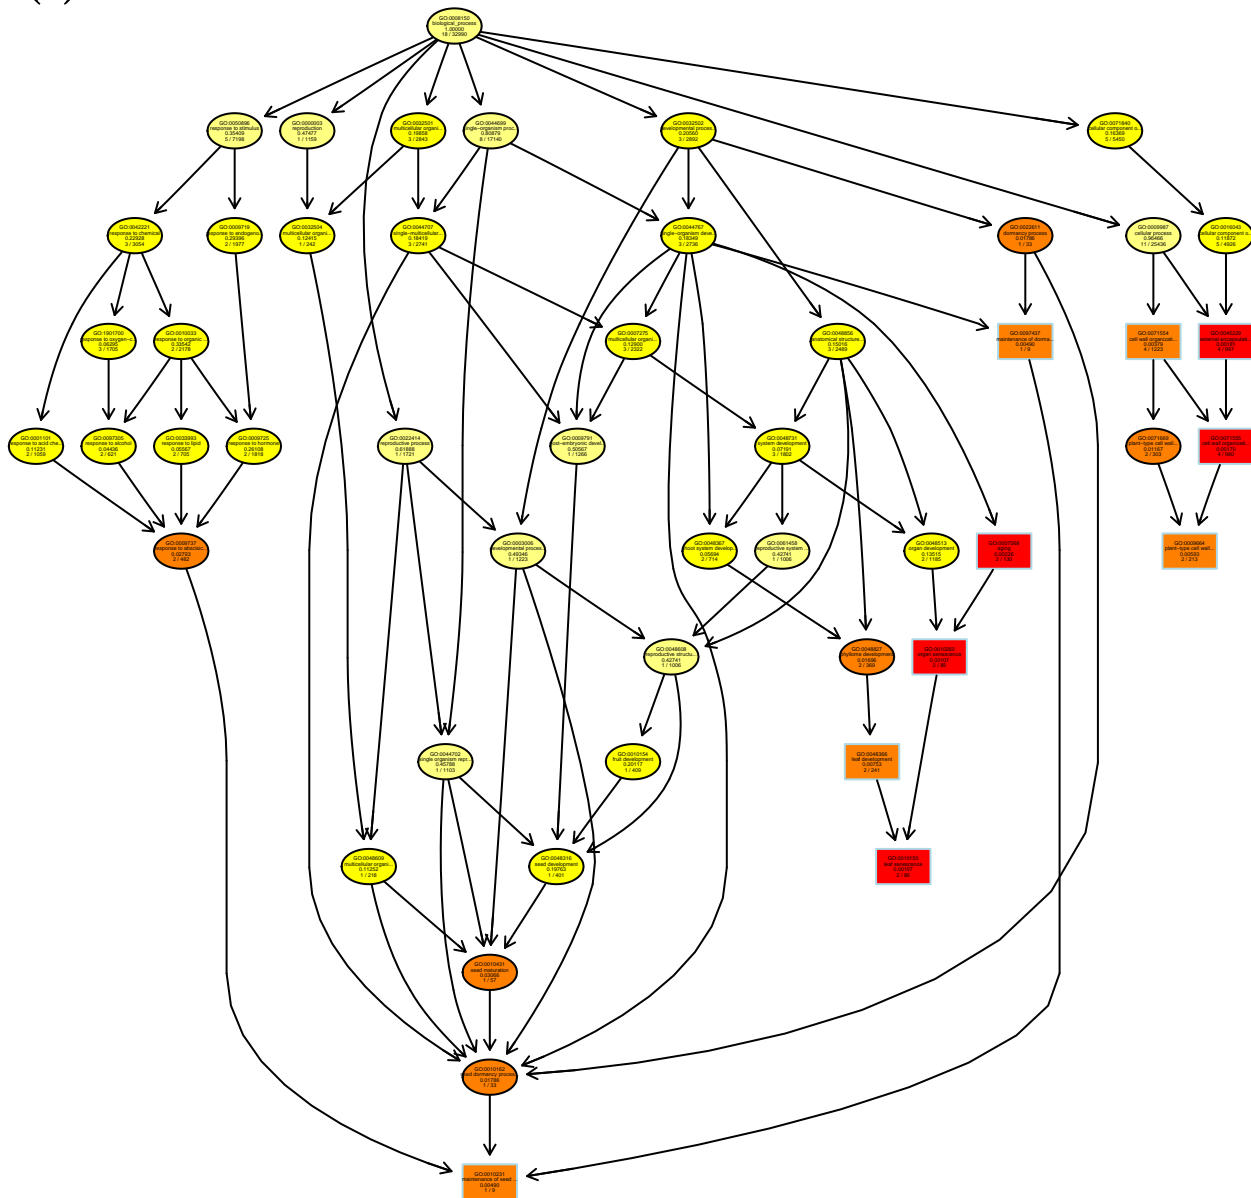

(B)

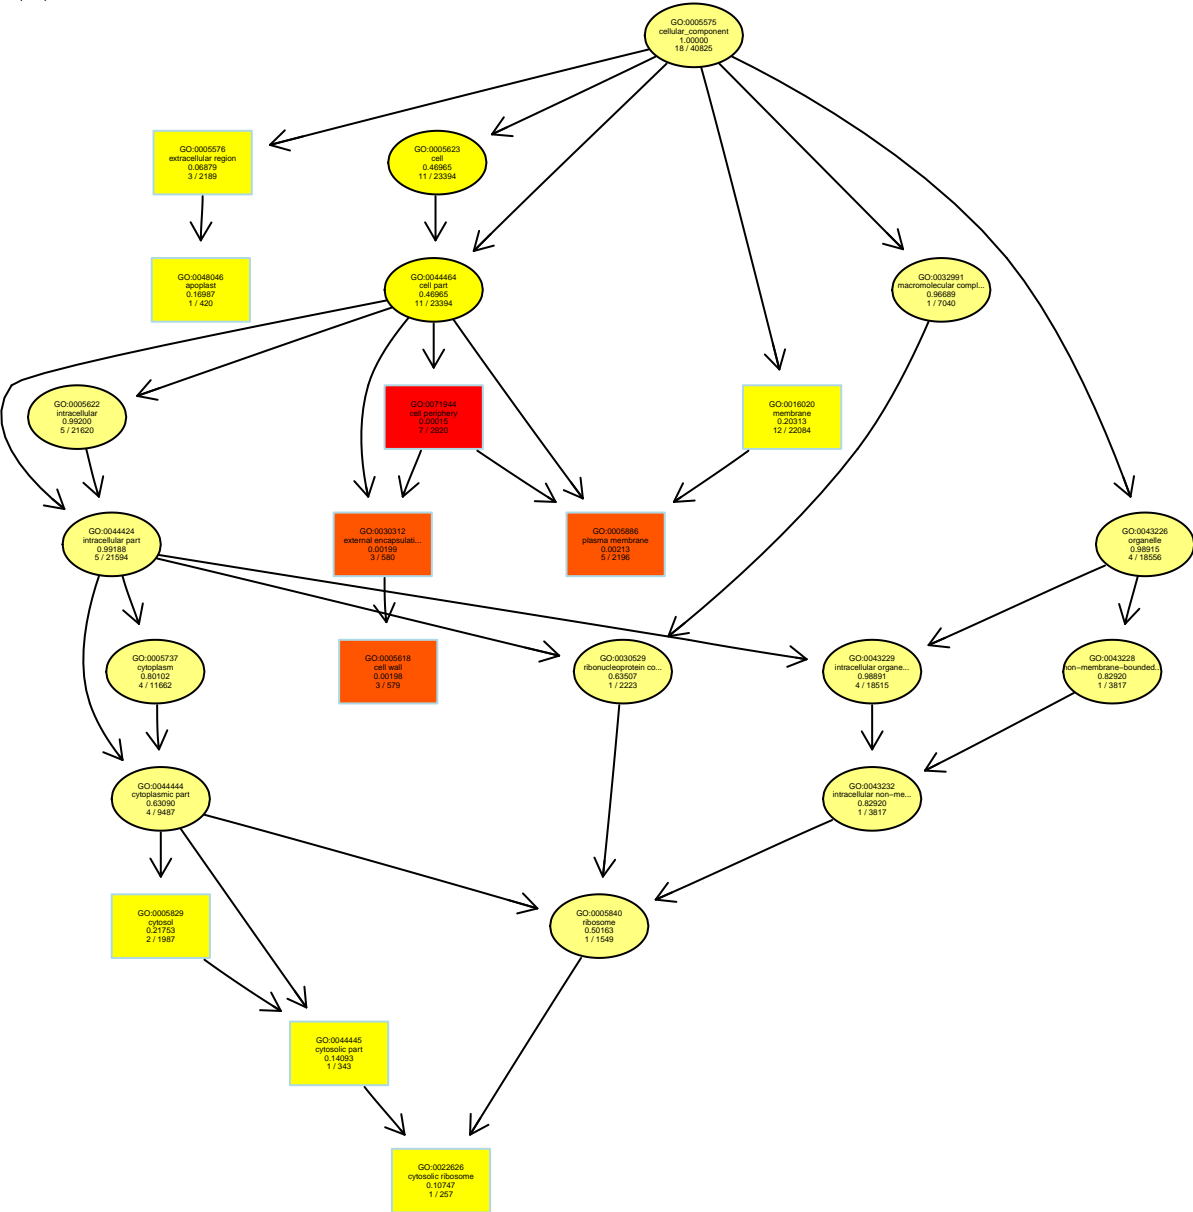

(C)

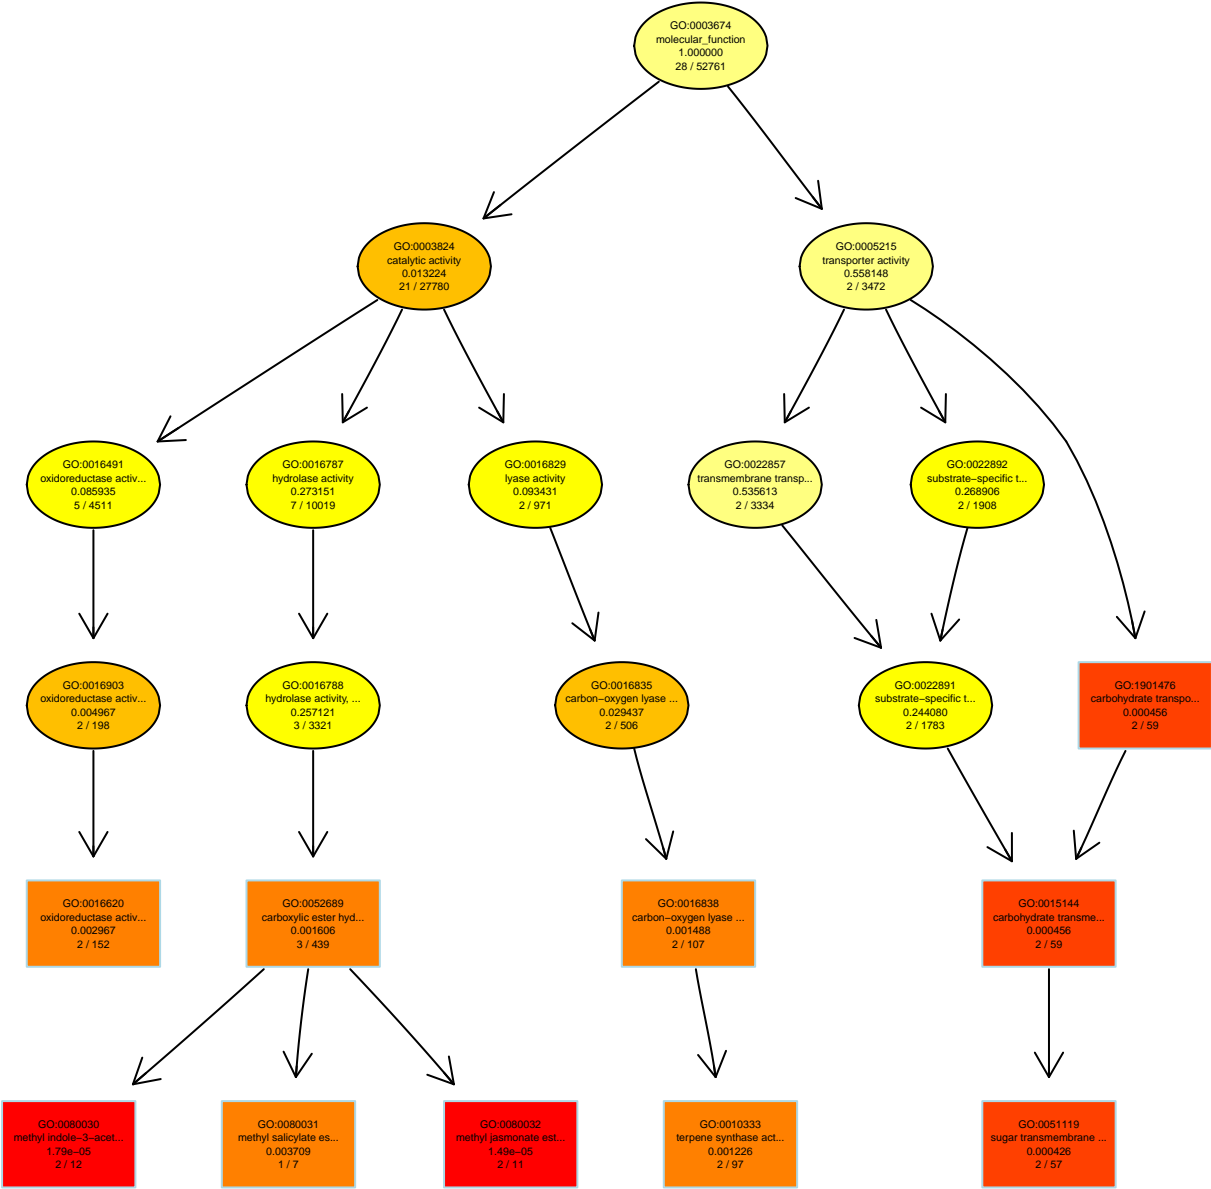

Supplement: s1 [file s1]

(A)

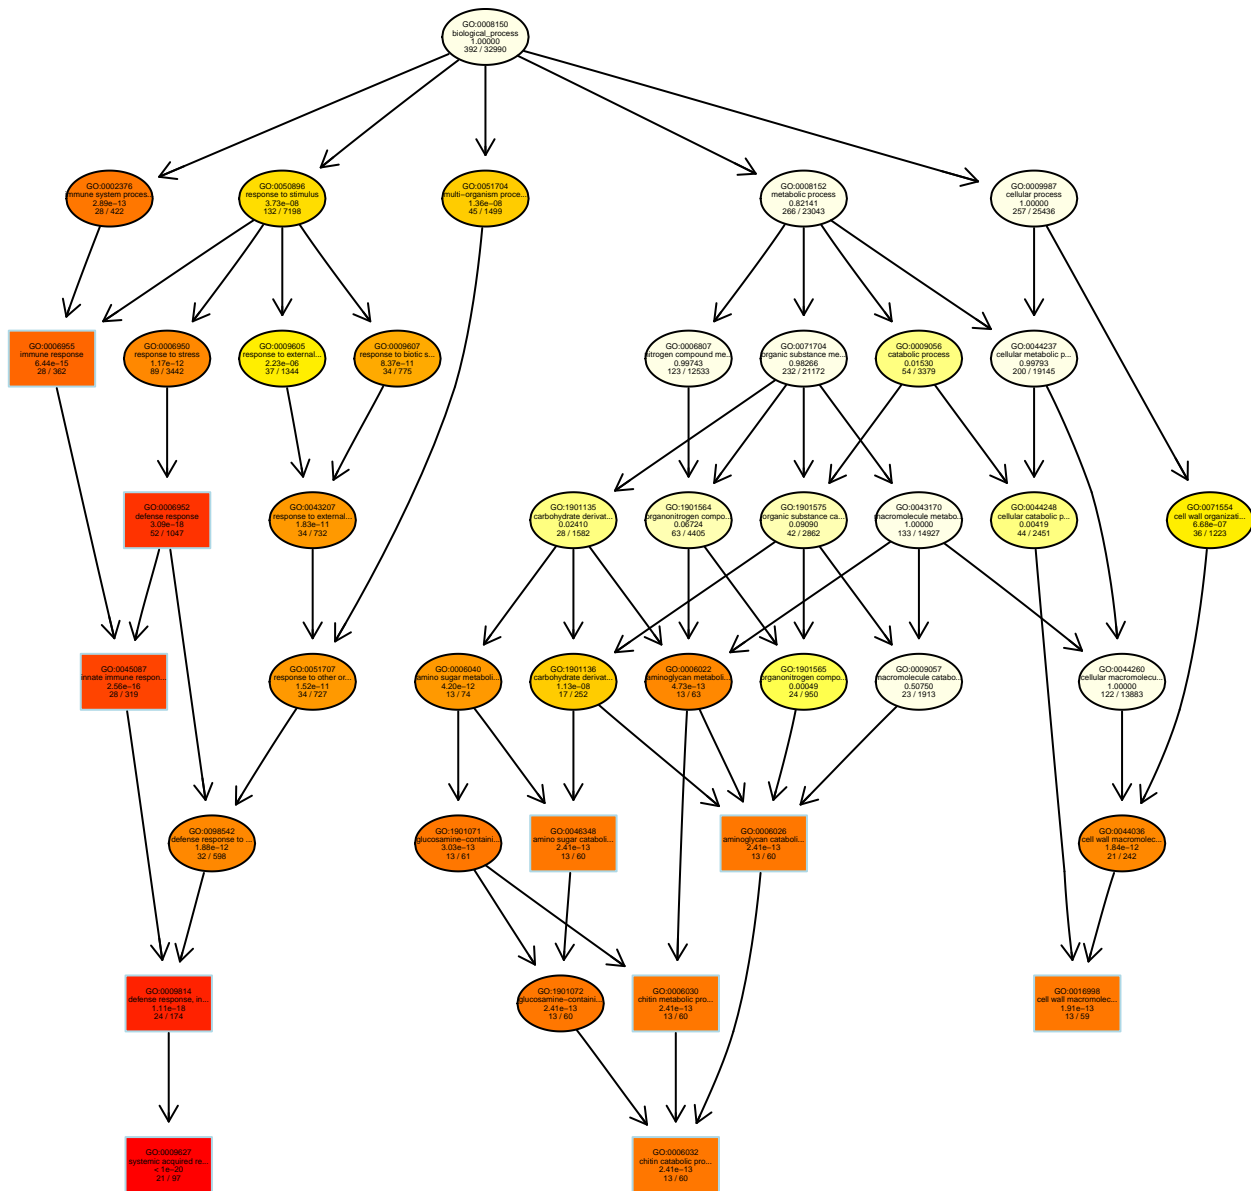

(B)

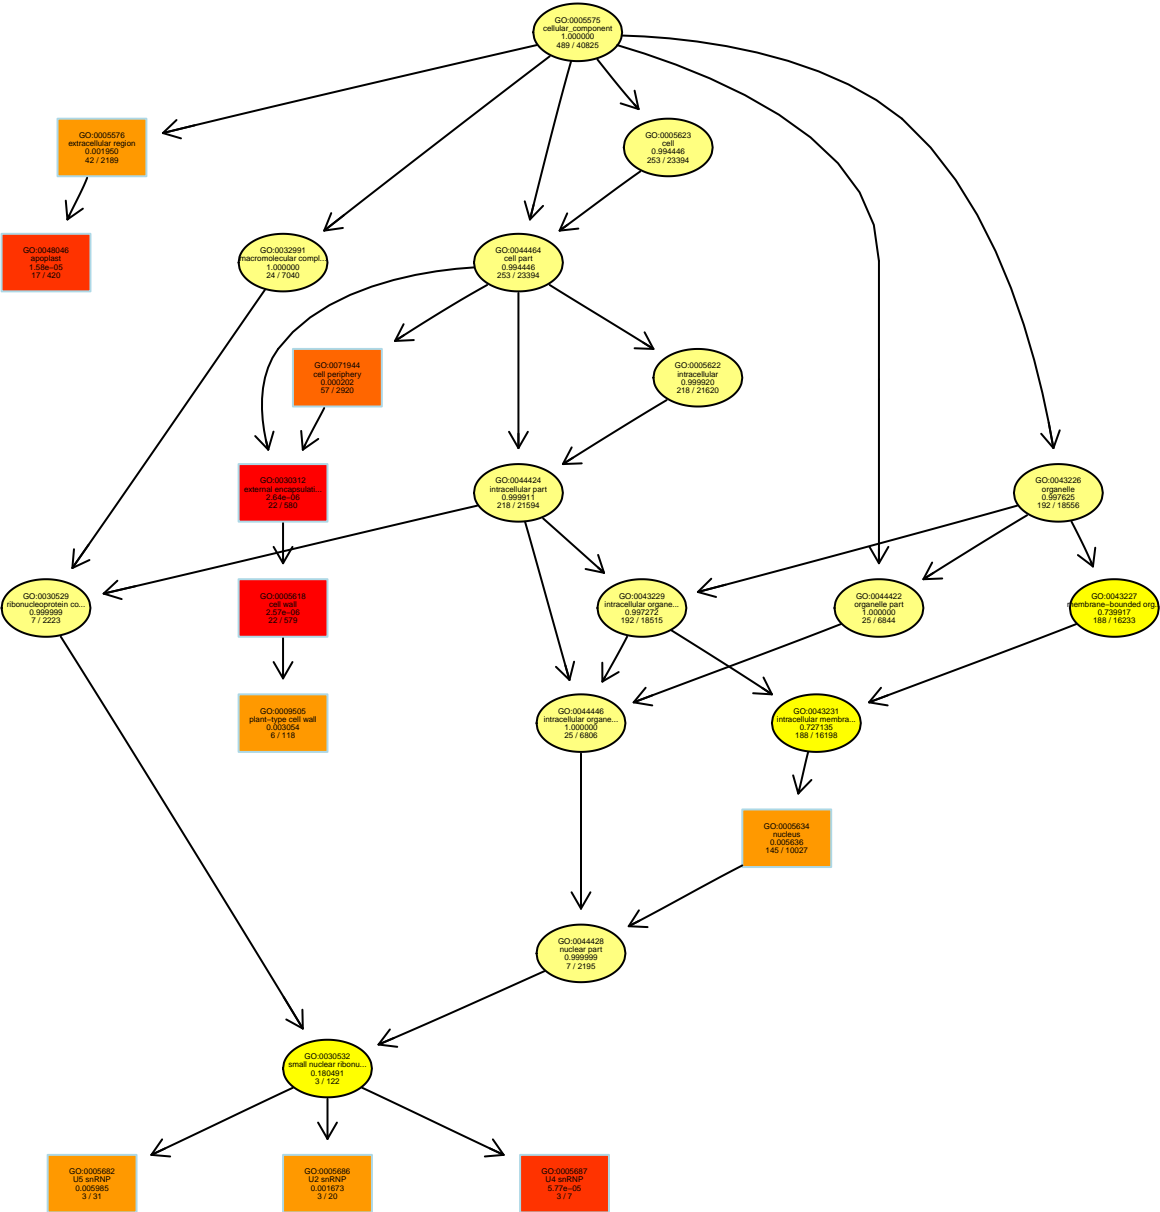

(C)

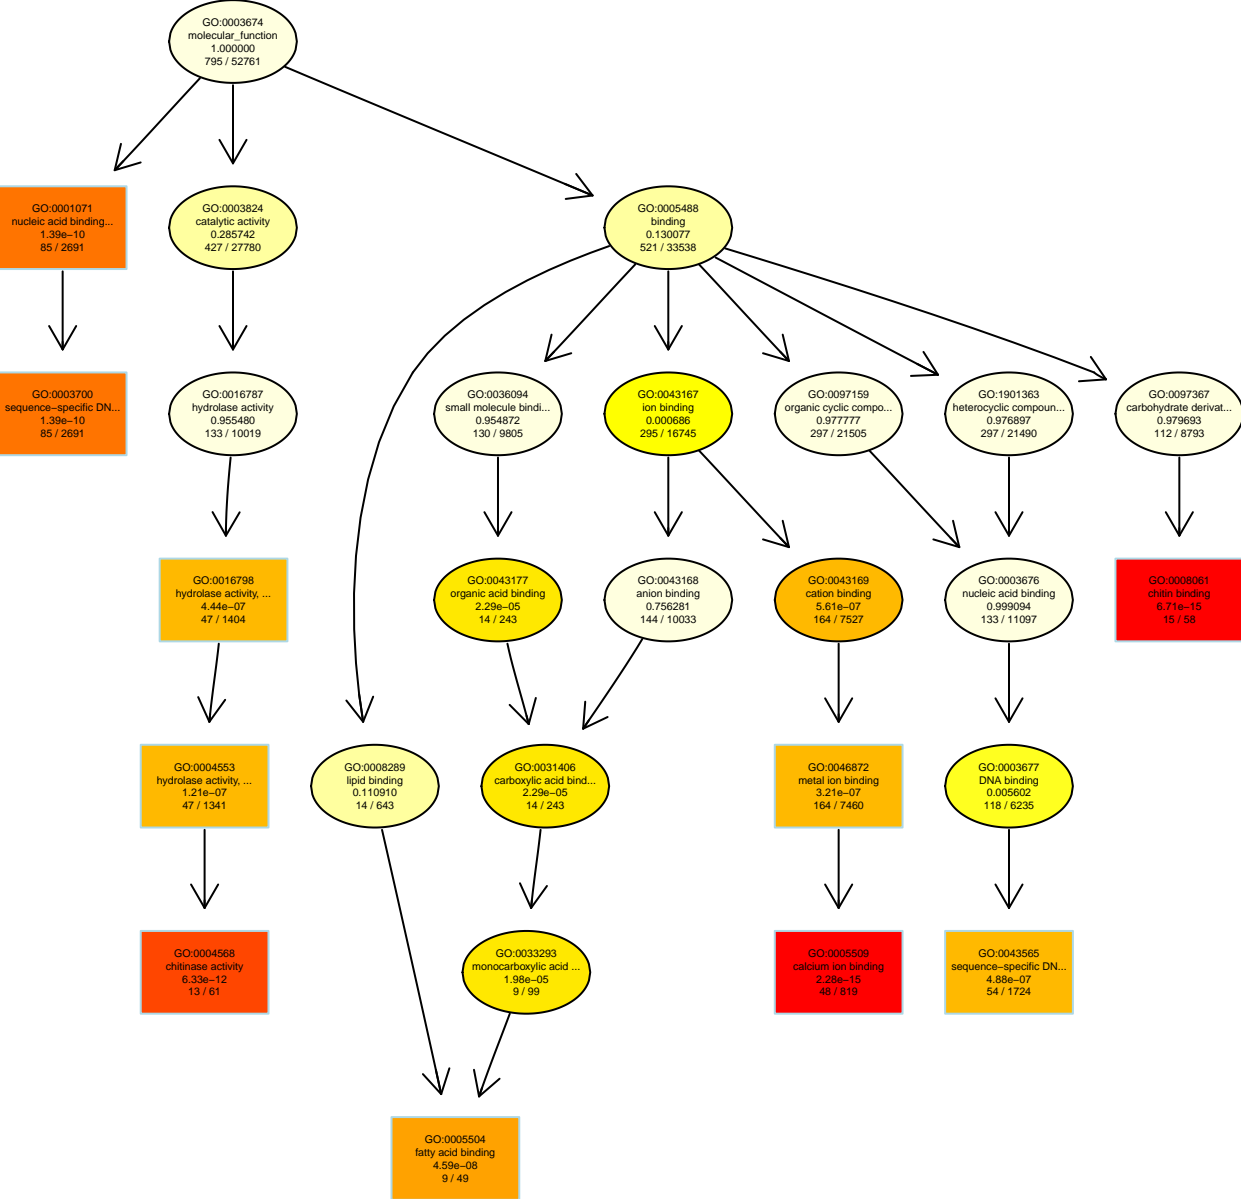

Supplement: s1 [file s1]

(A)

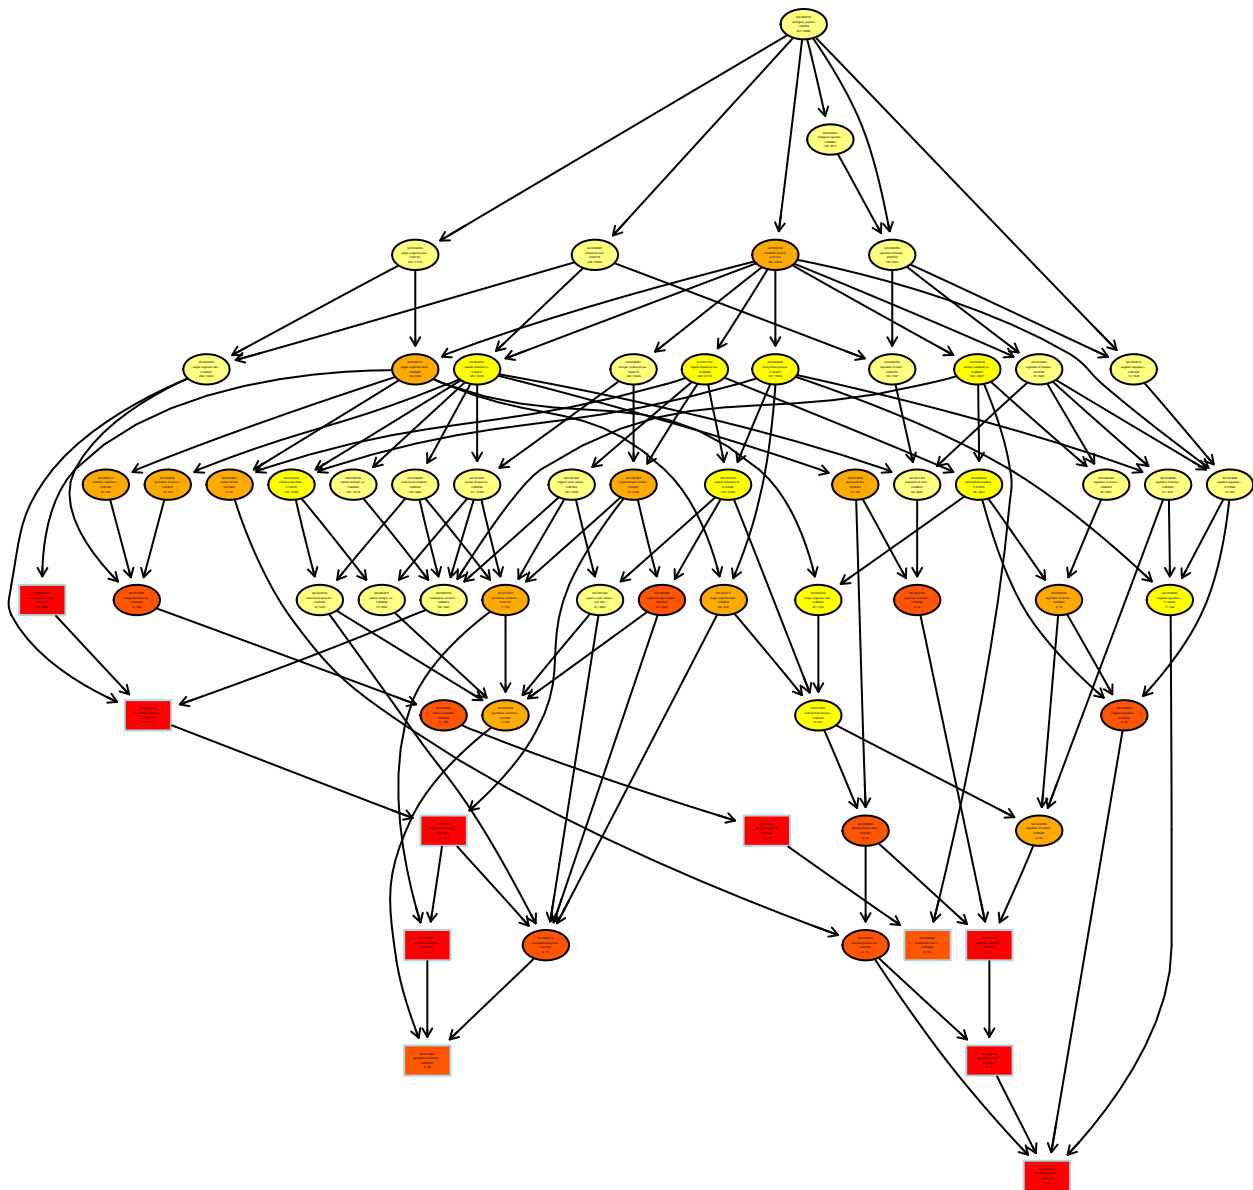

**(B)**

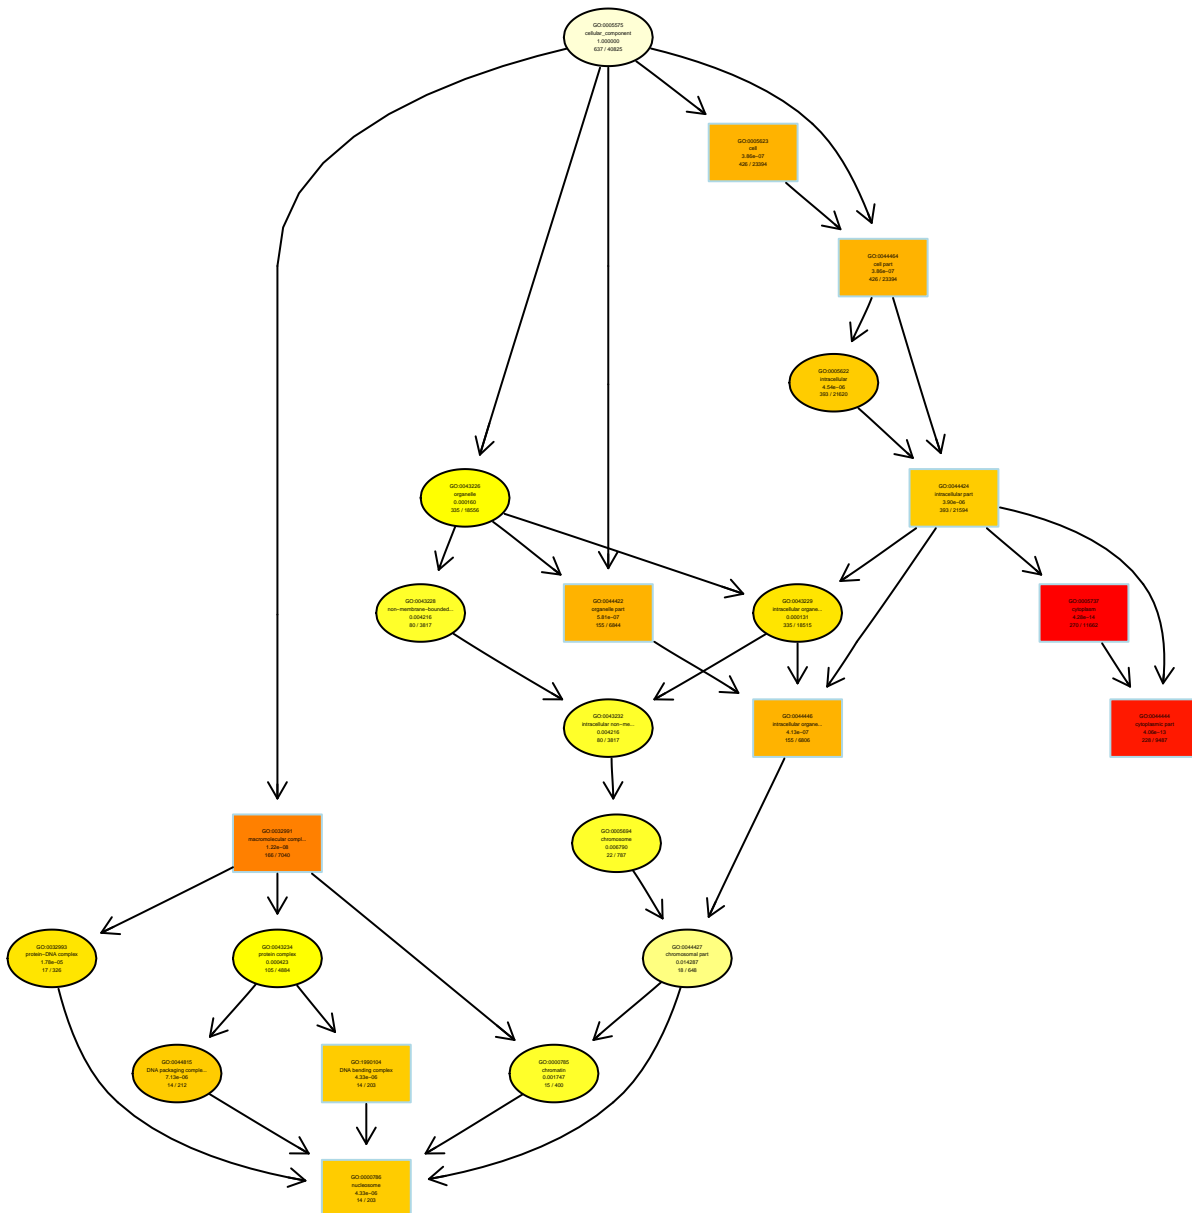

(C)

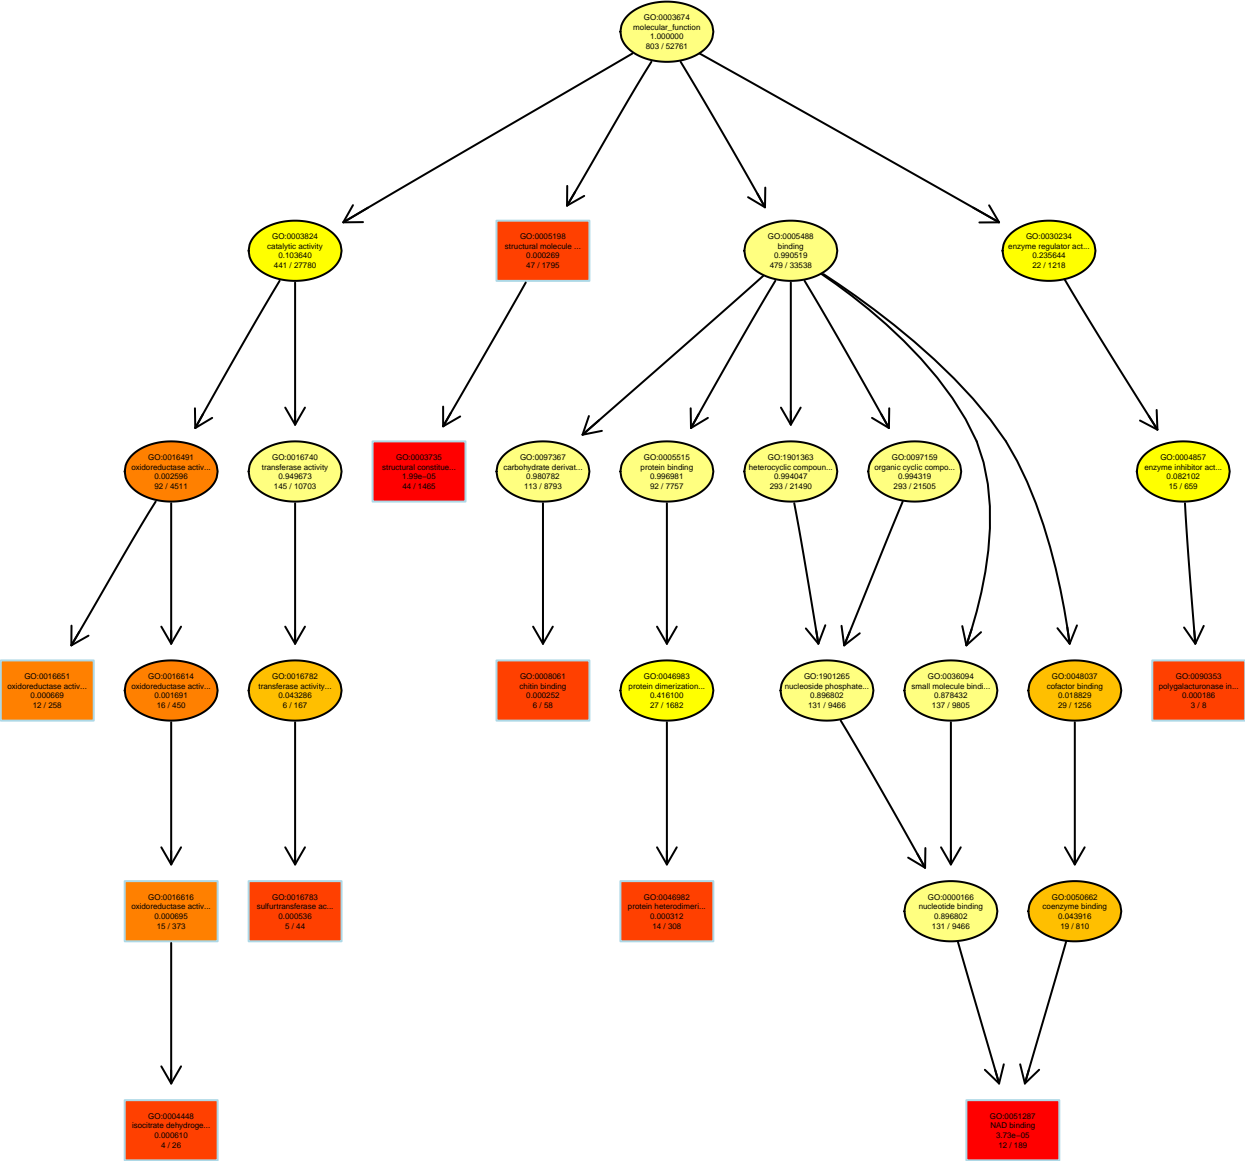

Supplement: s1 [file s1]

(A)

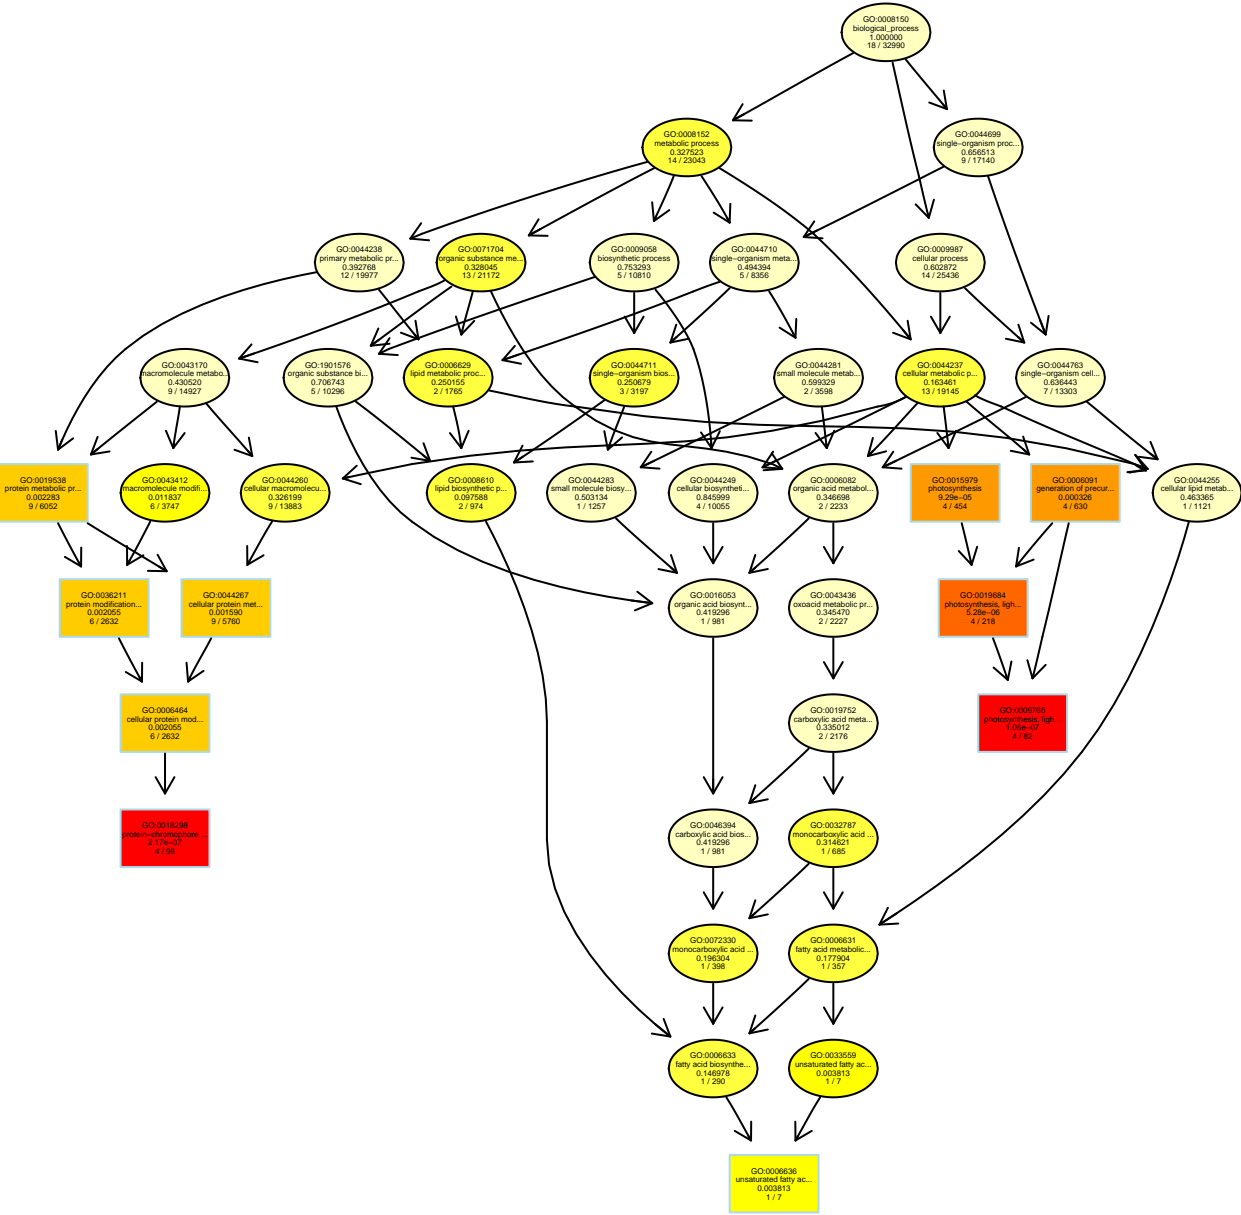

(B)

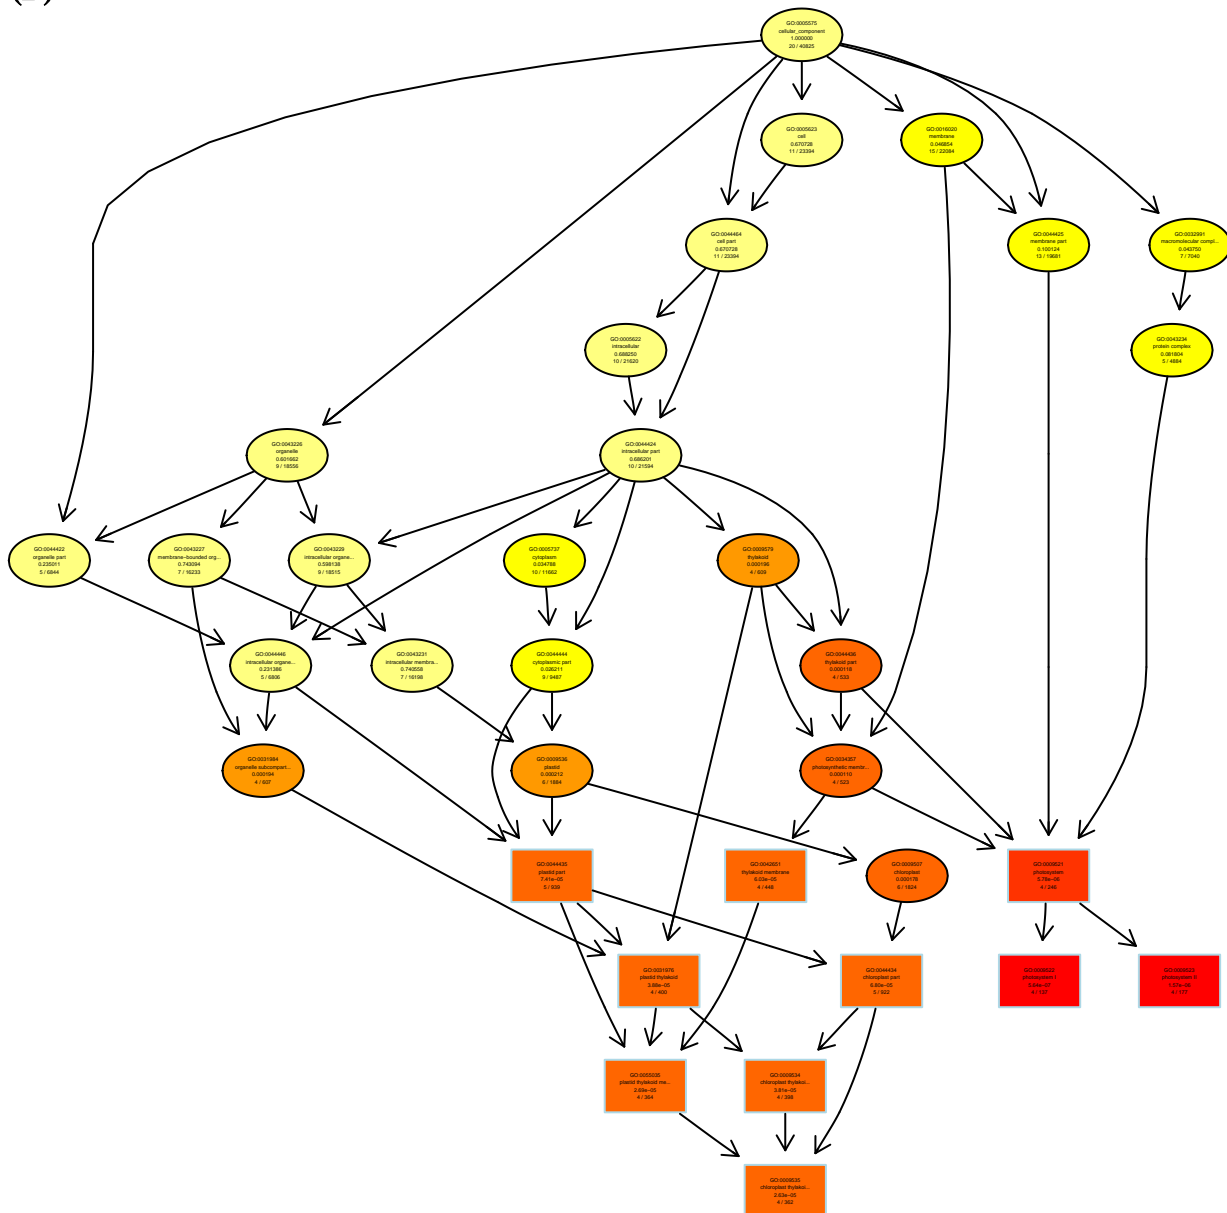

(C)

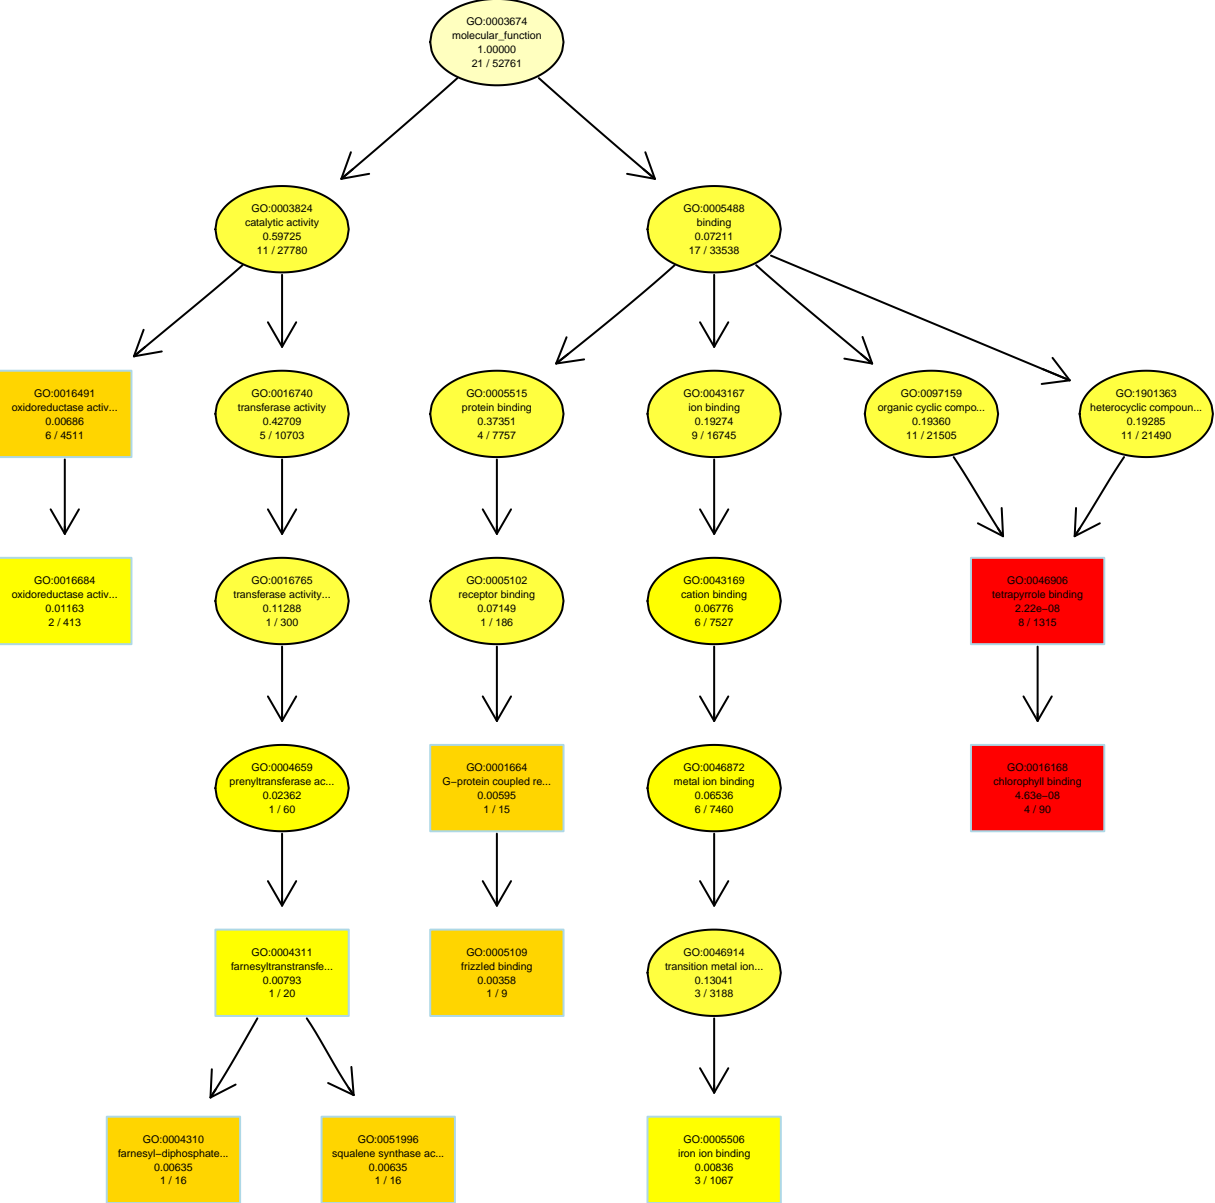

Supplement: s1 [file s1]

(A)

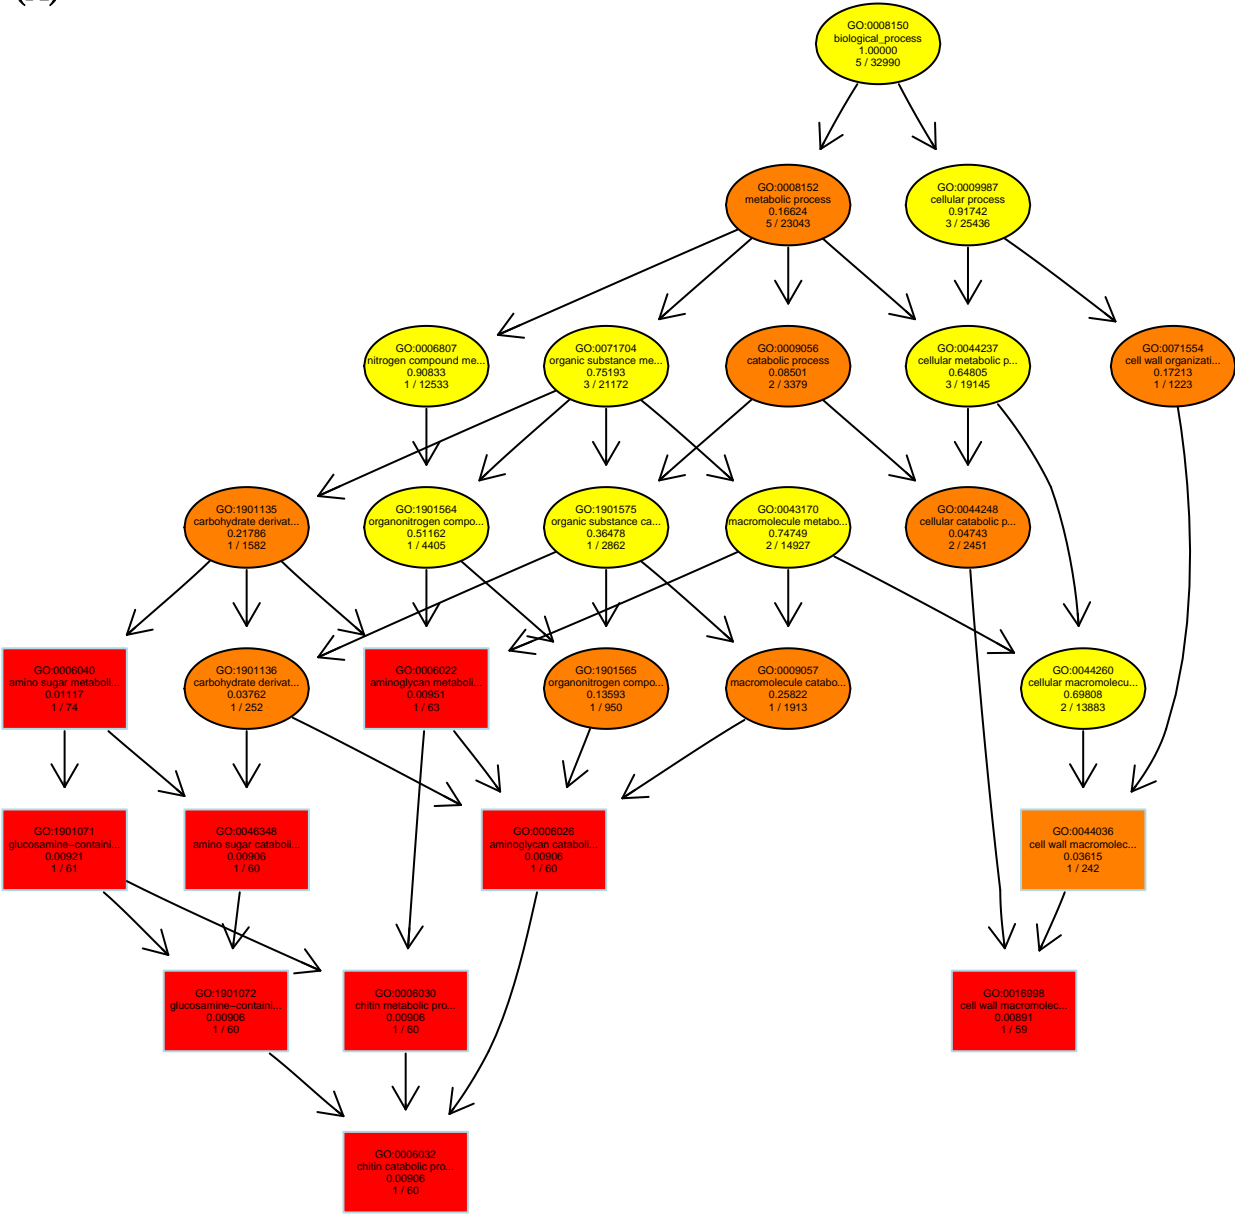

(B)

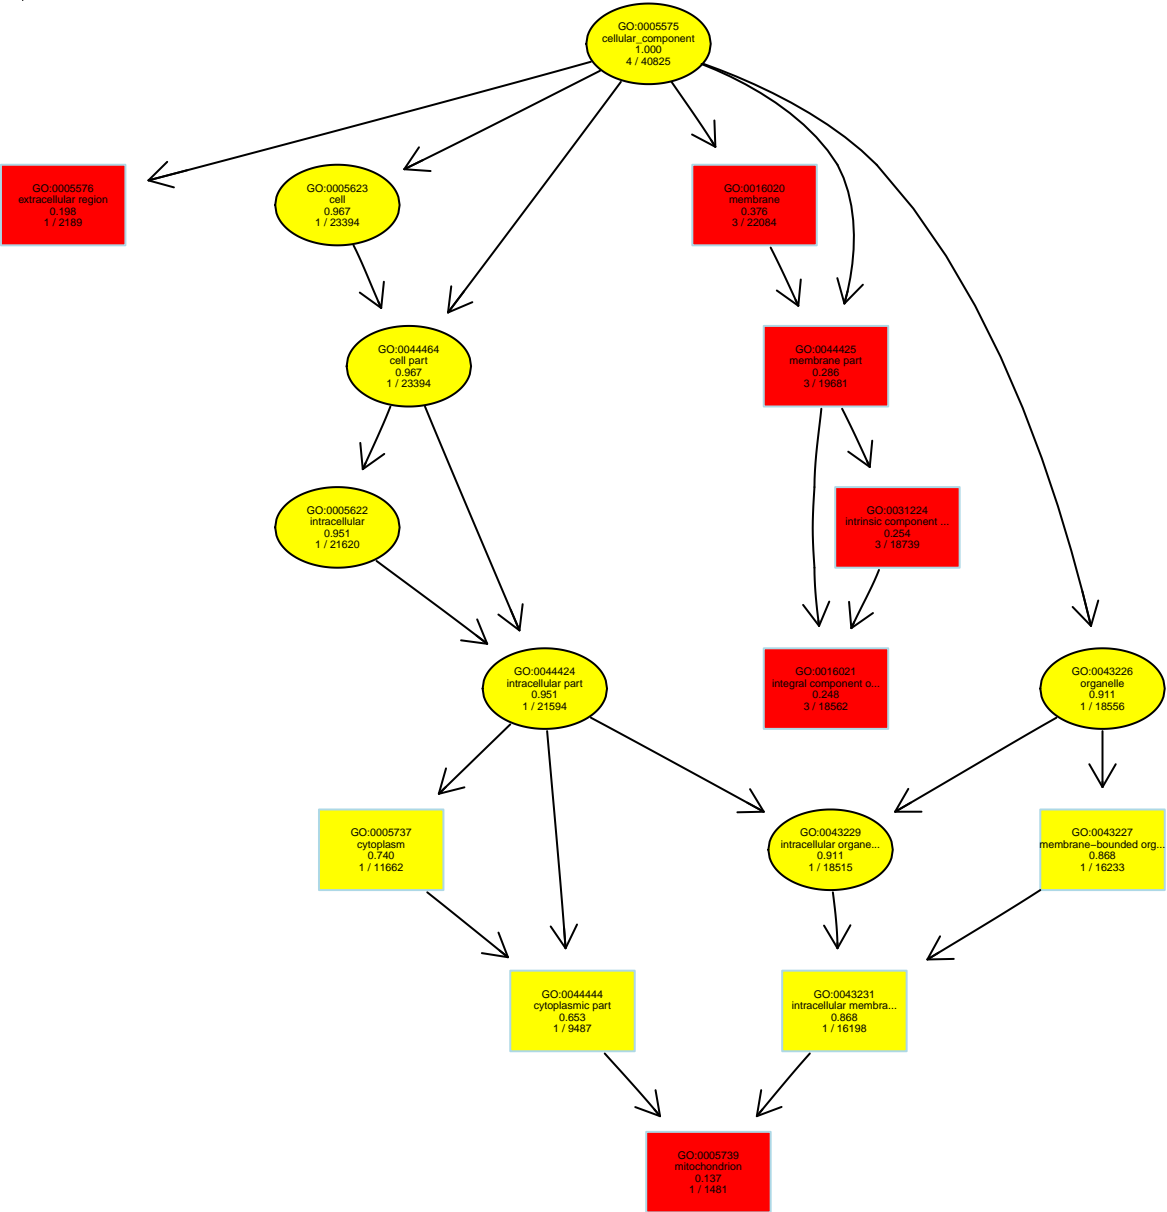

(C)

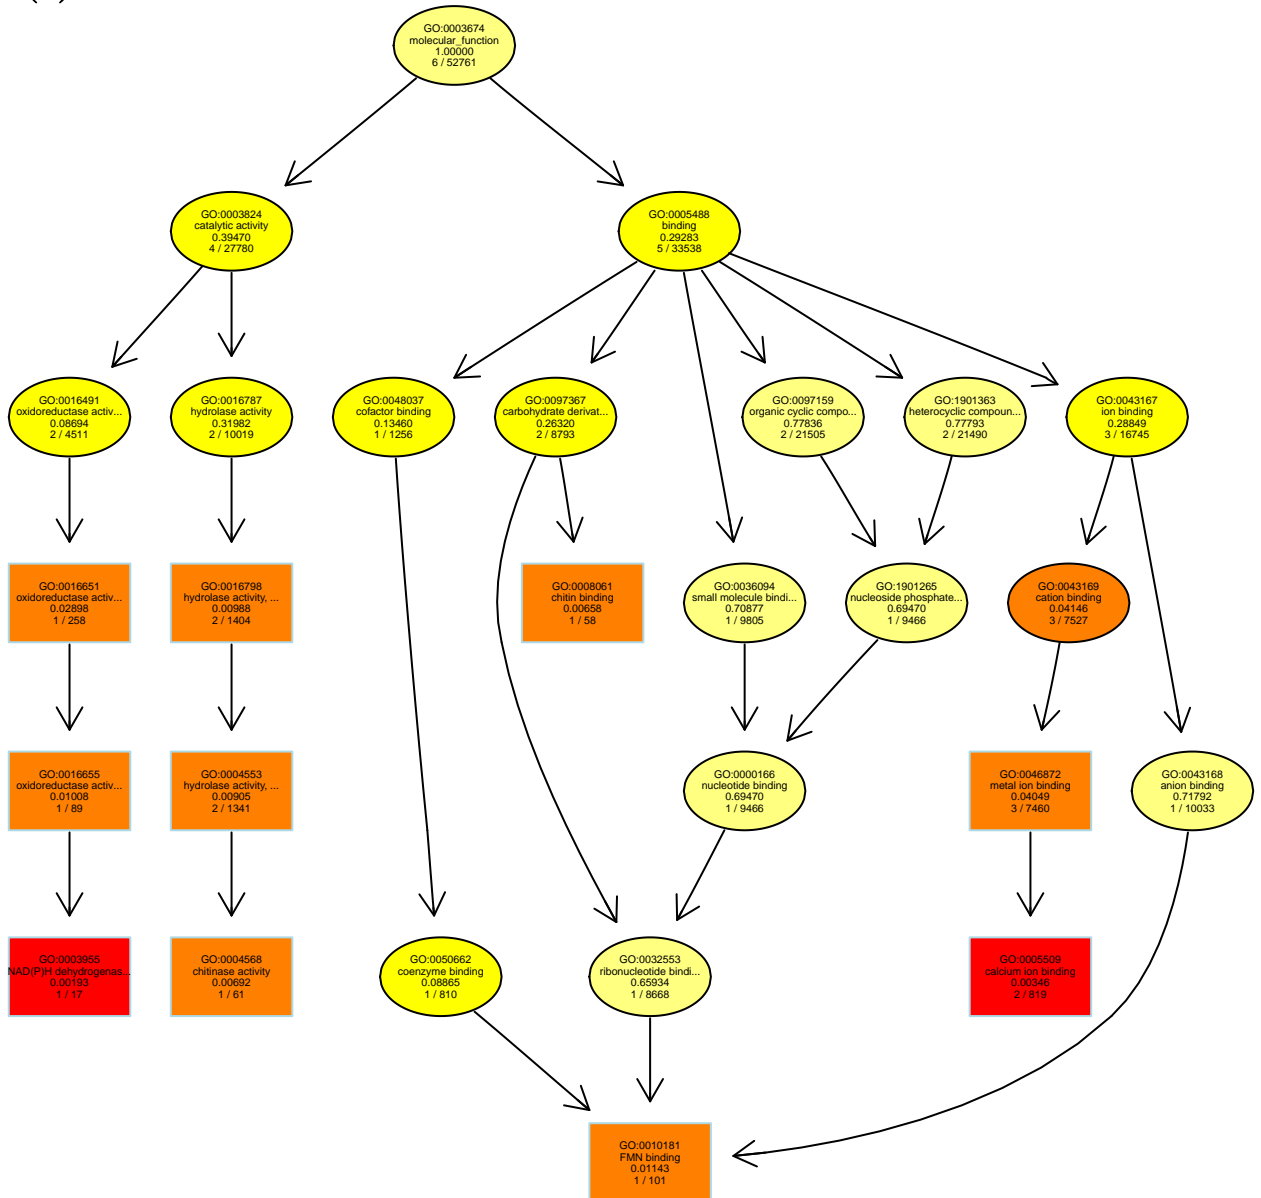

Supplement: s1 [file s1]

(A)

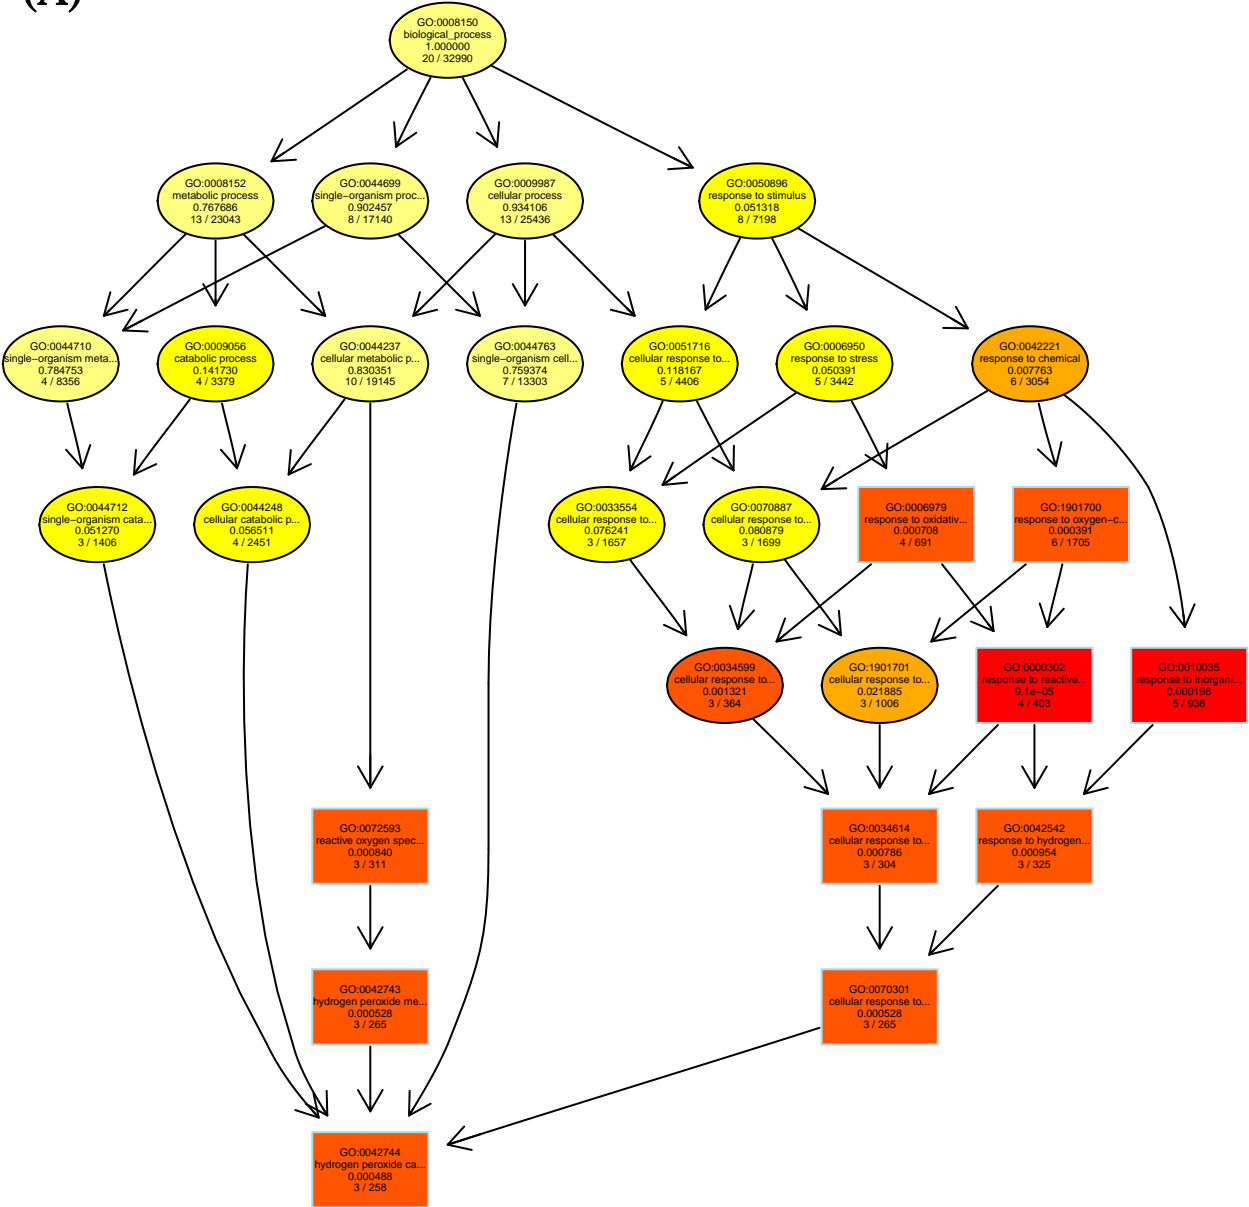

**(B)**

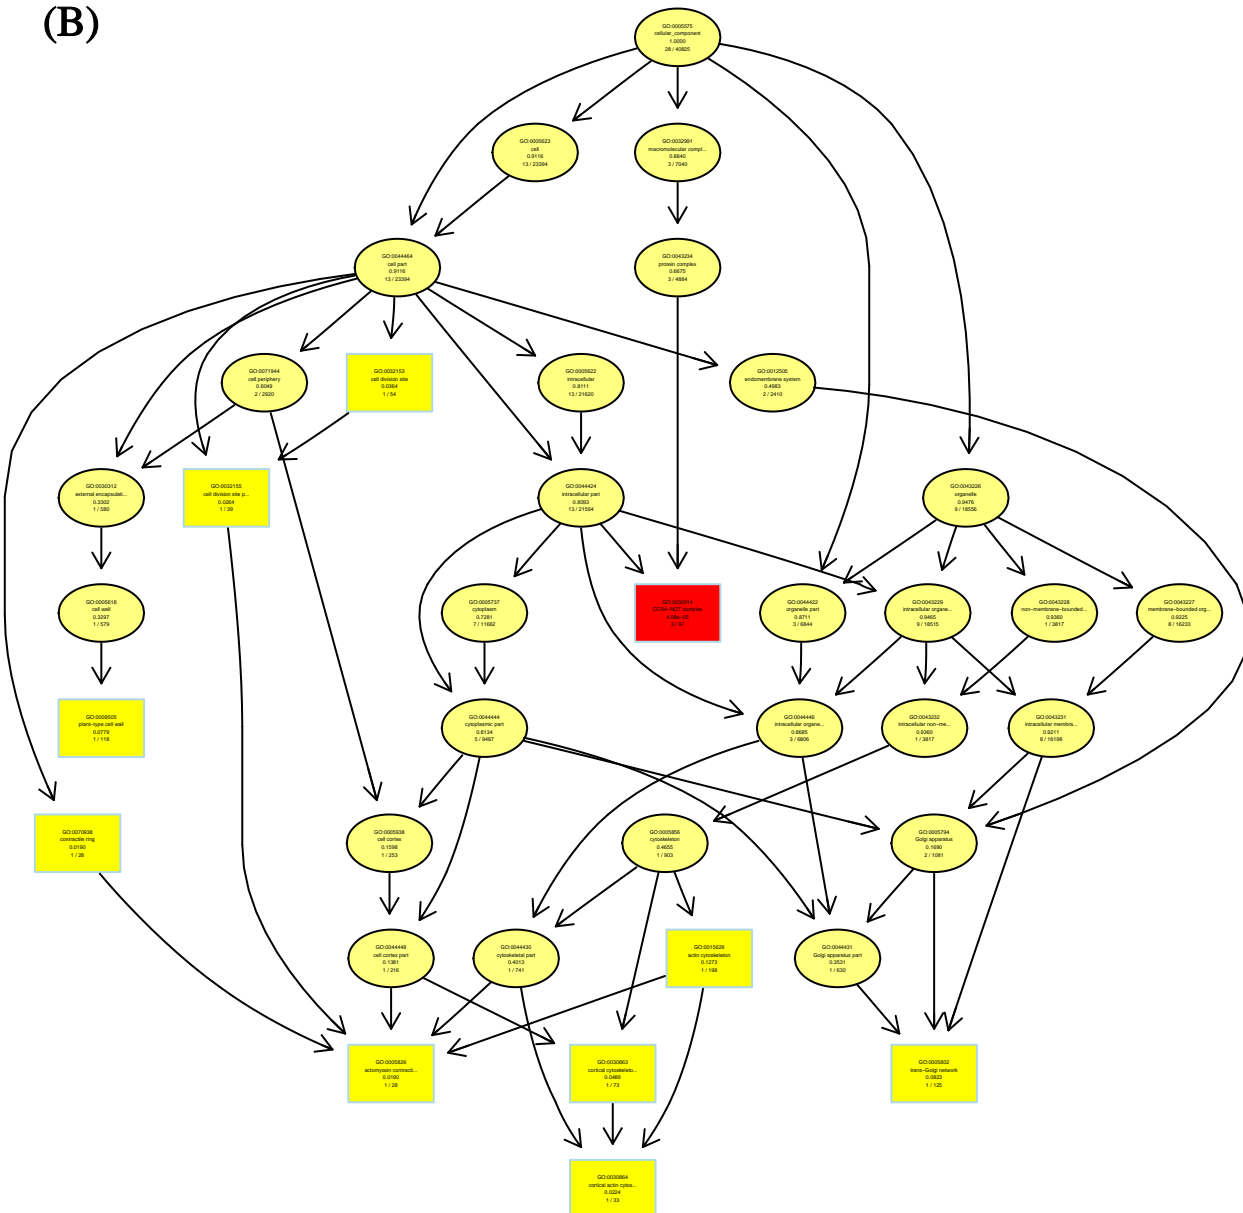

(C)

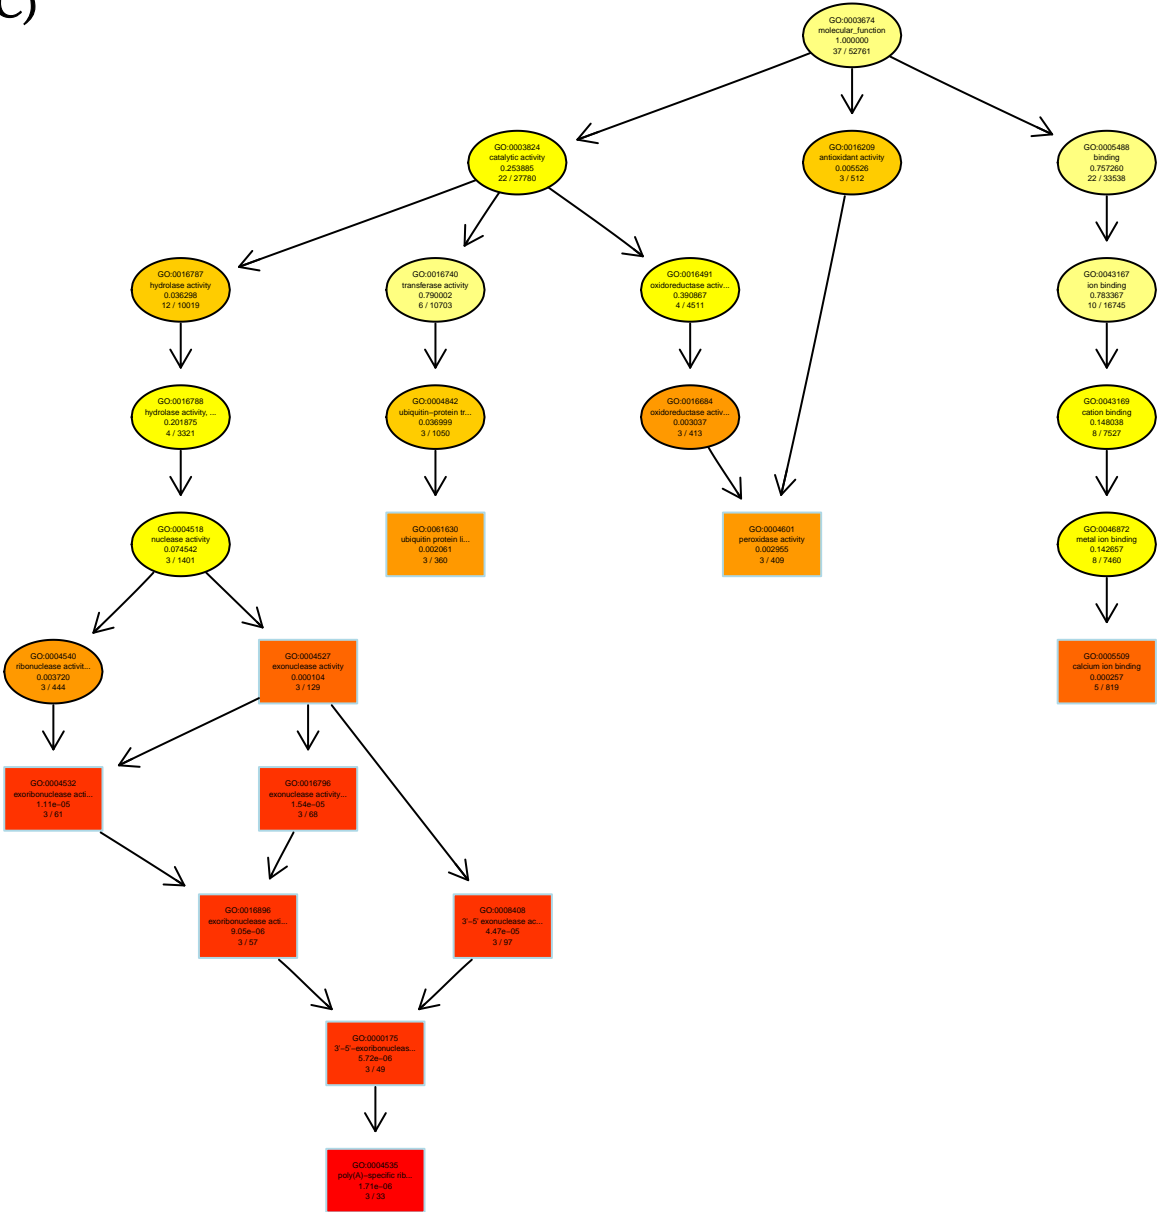

Supplement: s1 [file s1]

(A)

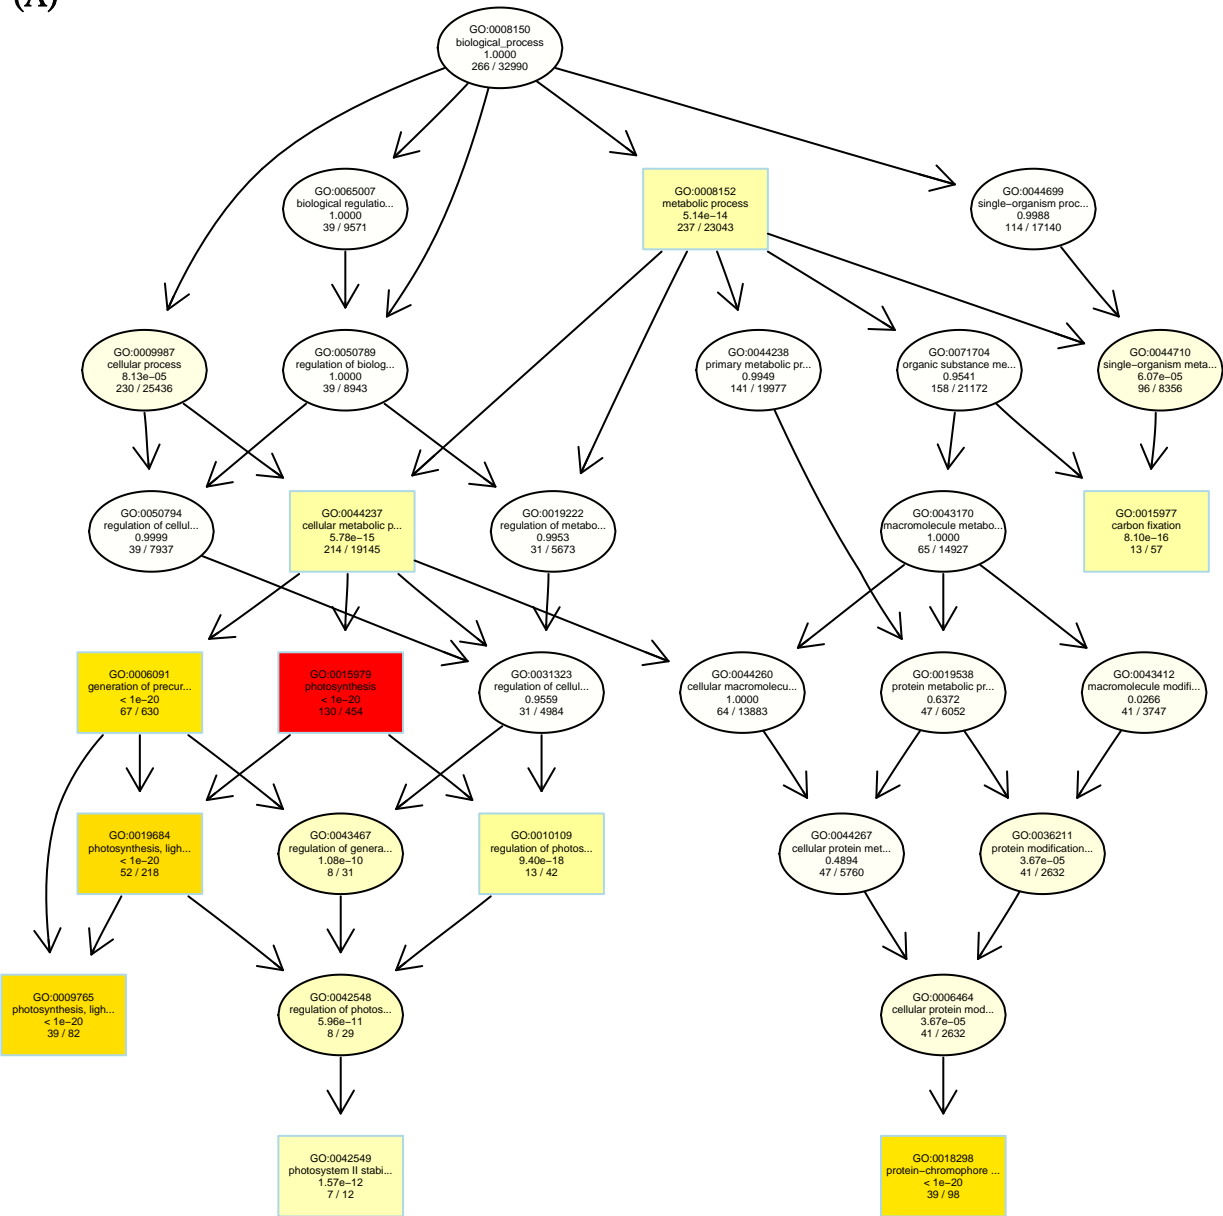

(B)

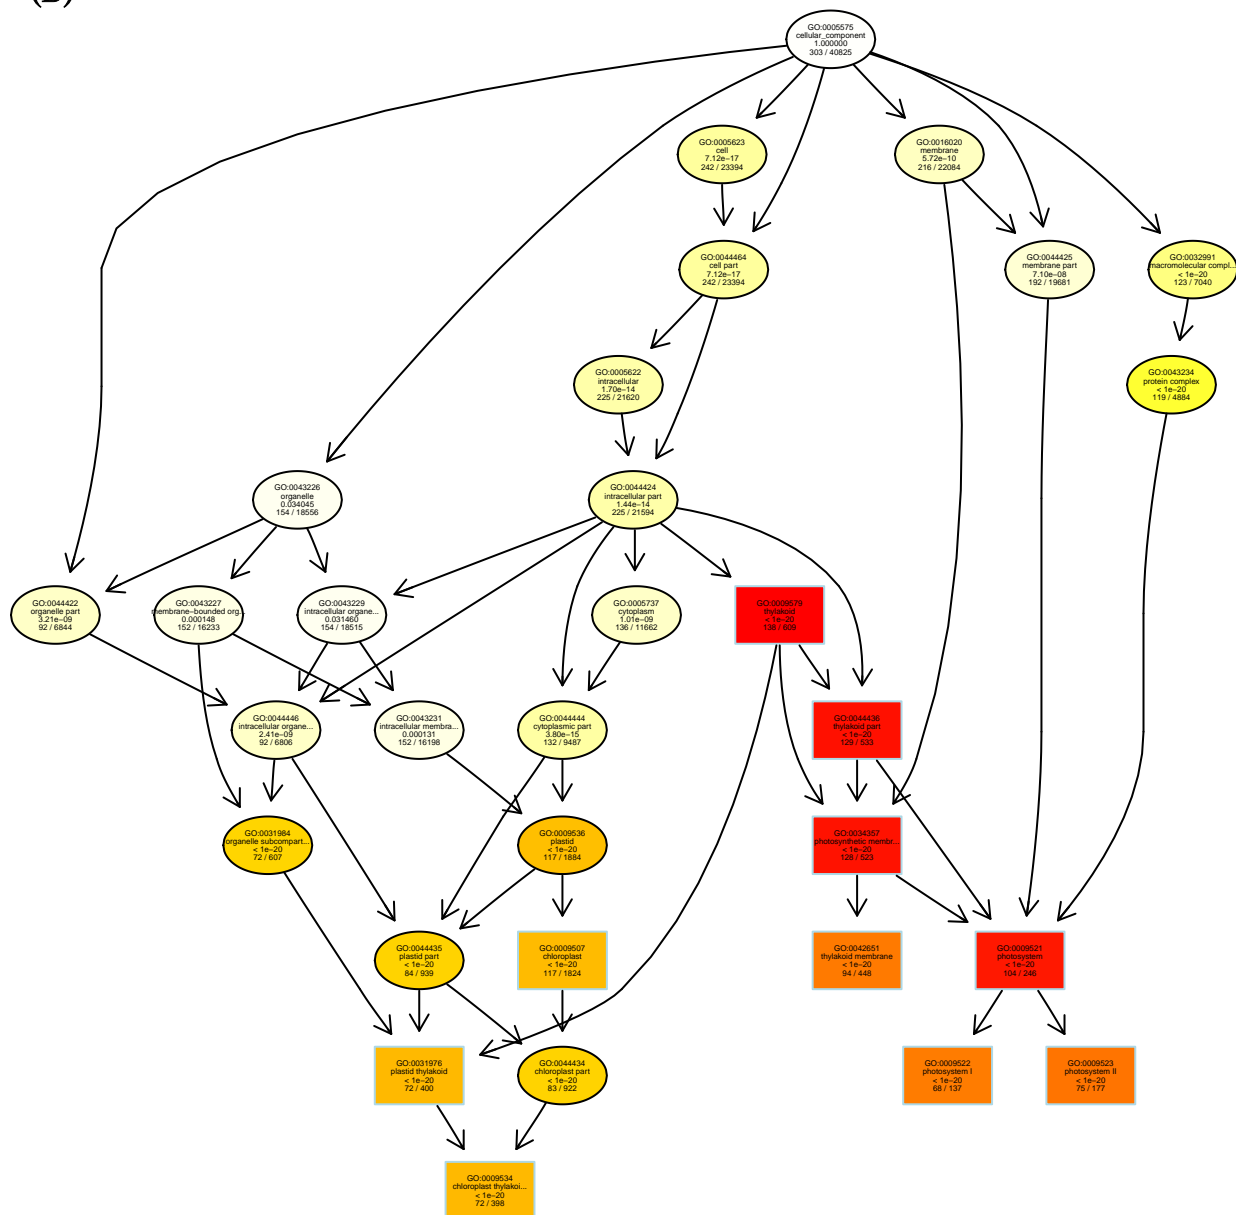

(C)

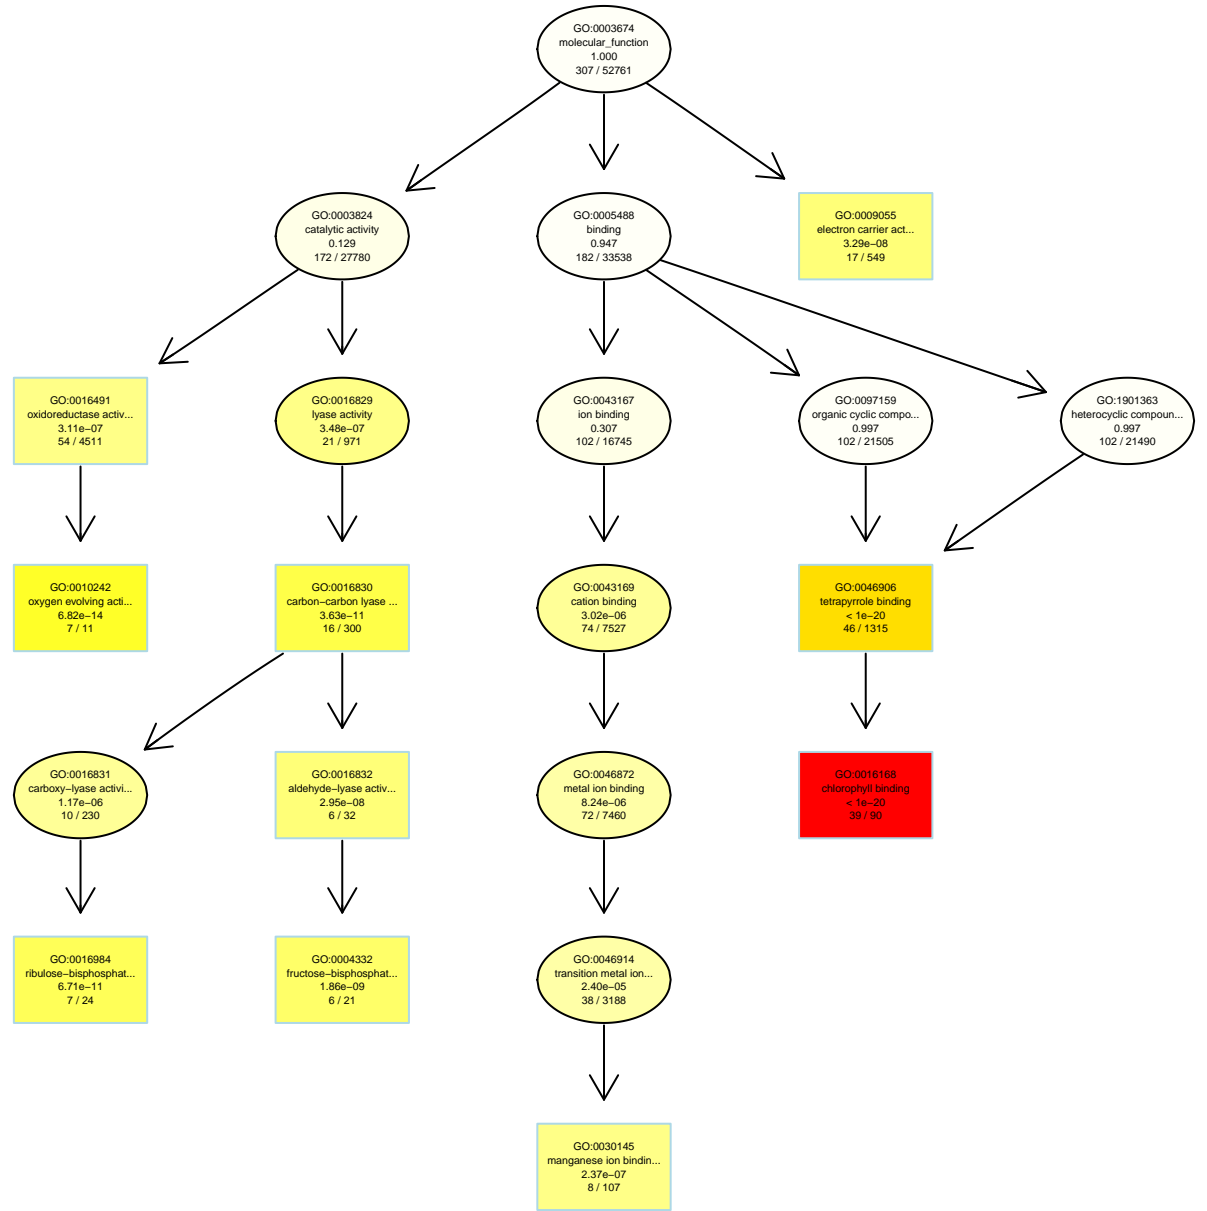

Supplement: s1 [file s1]

(A)

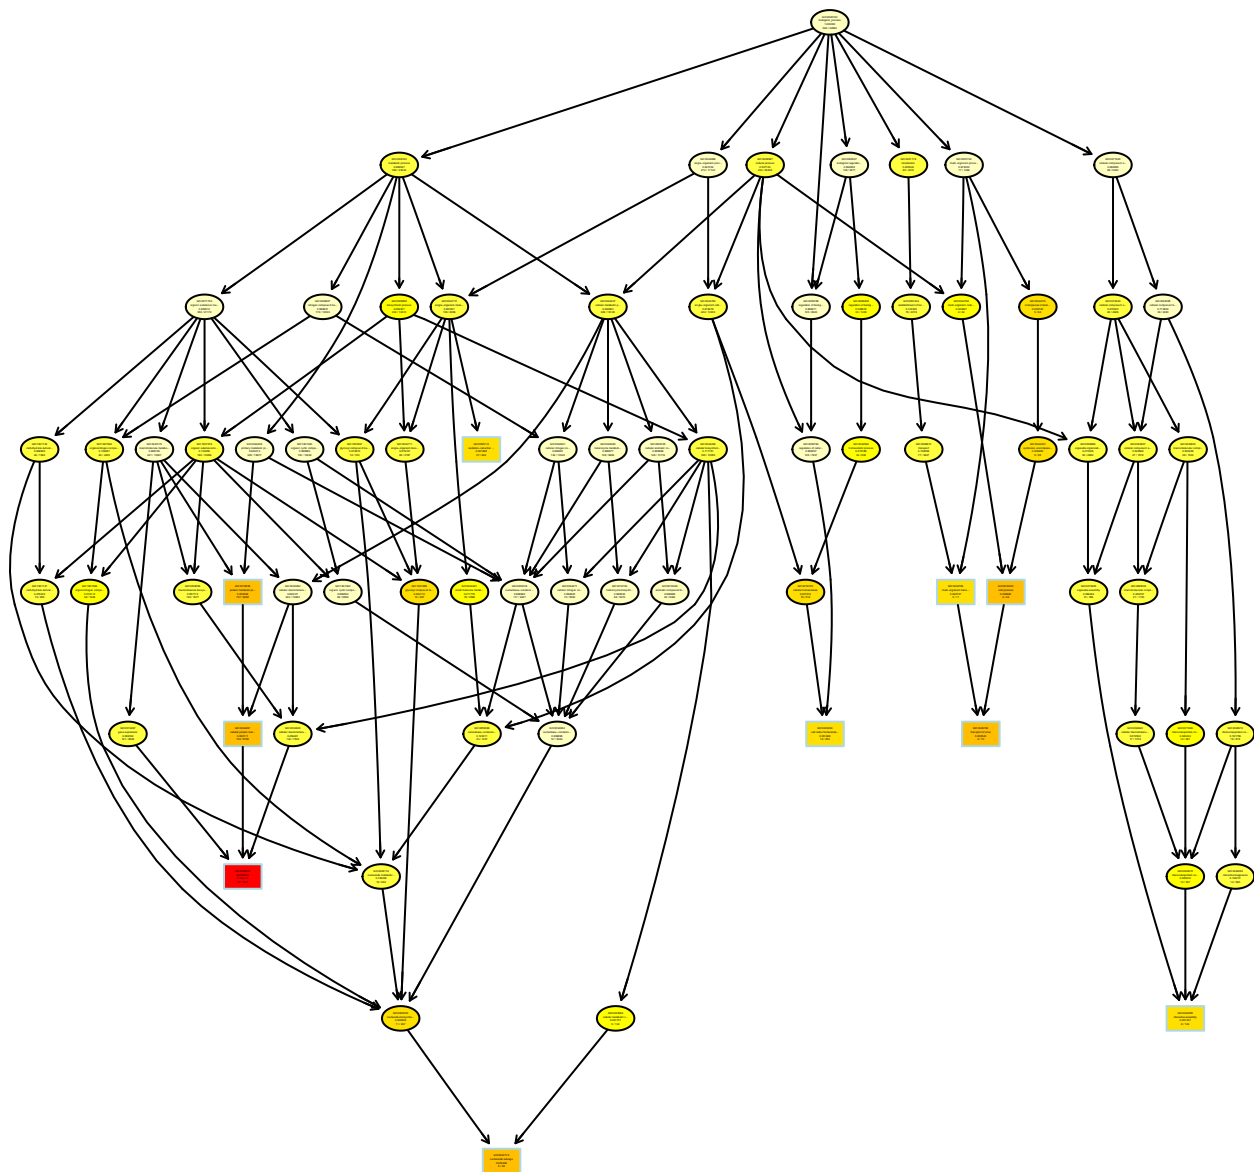

(B)

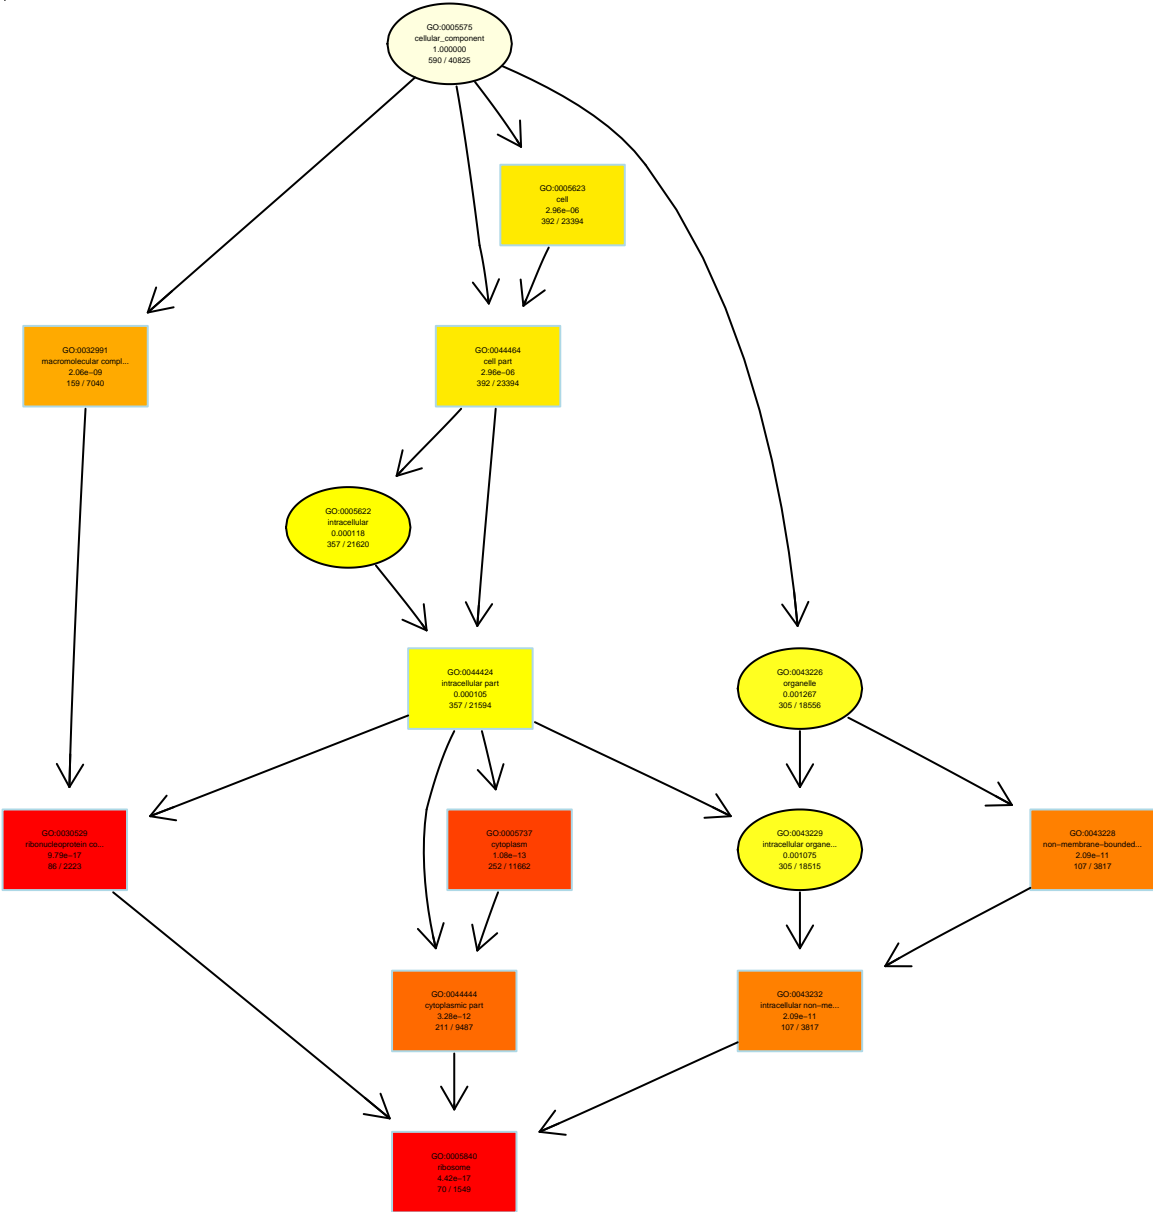

(C)

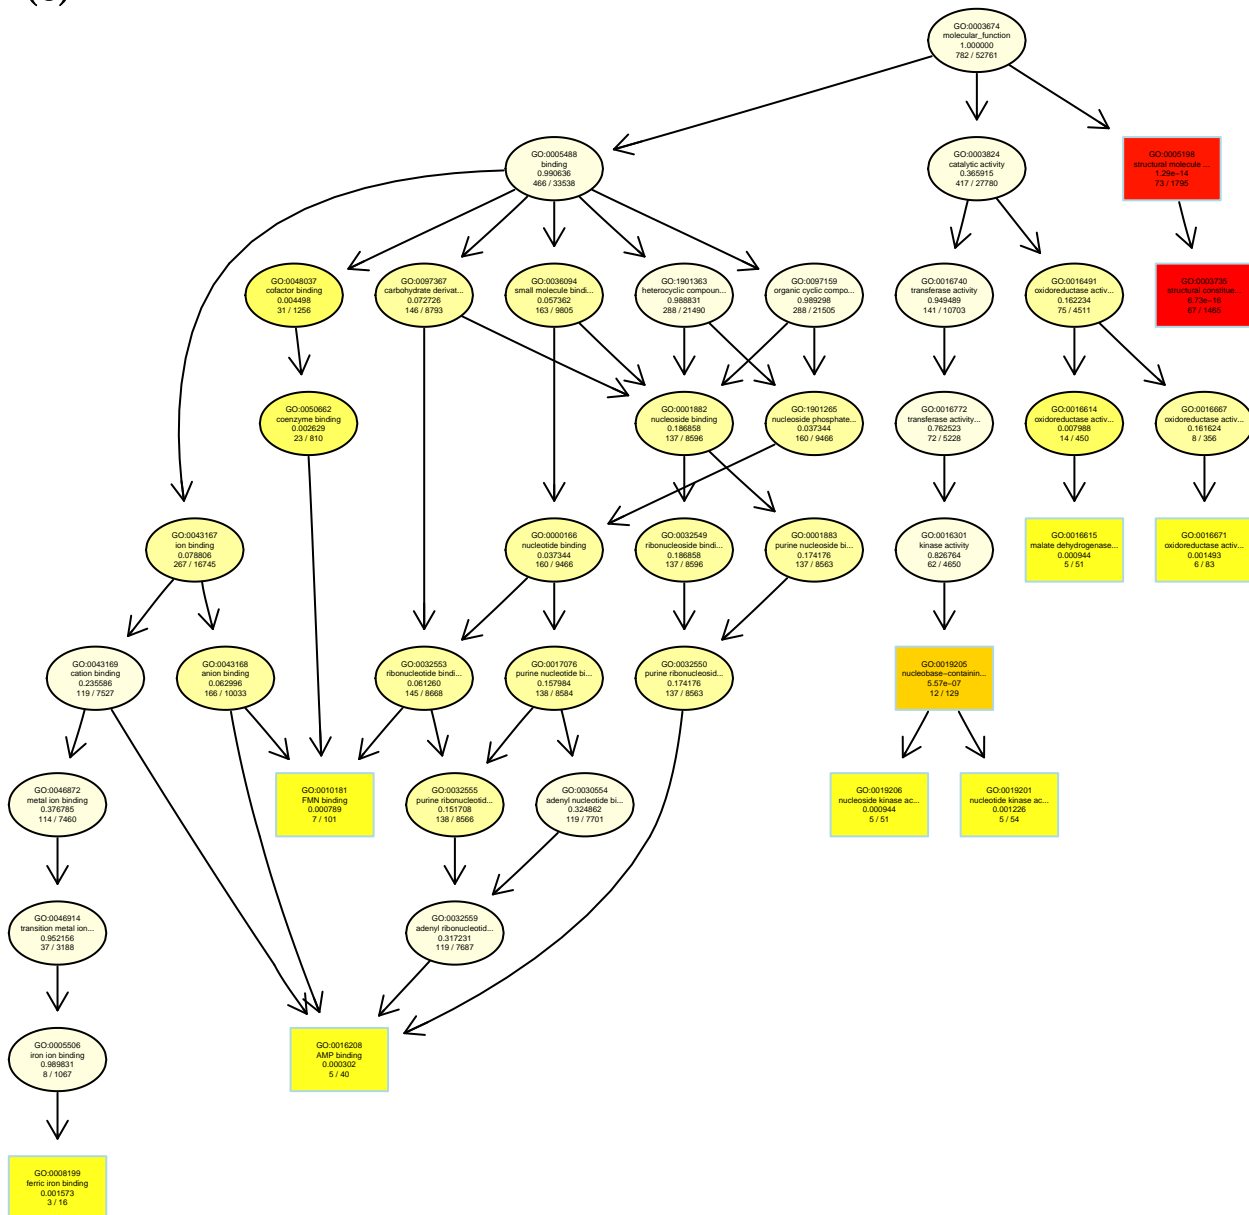

Supplement: s1 [file s1]

(A)

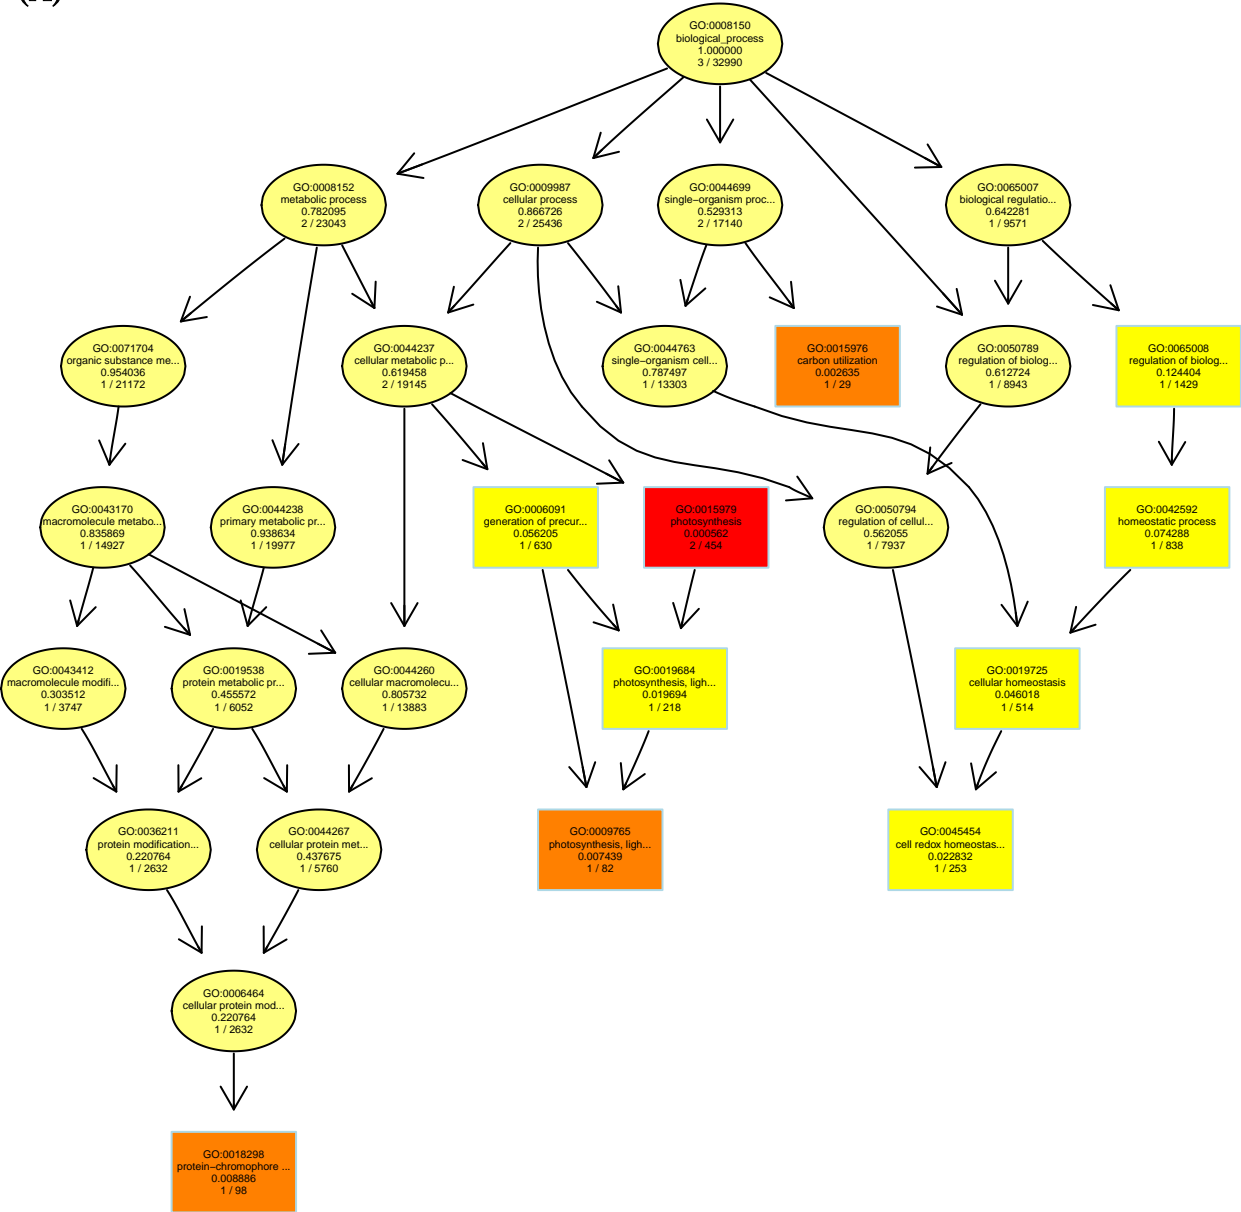

(B)

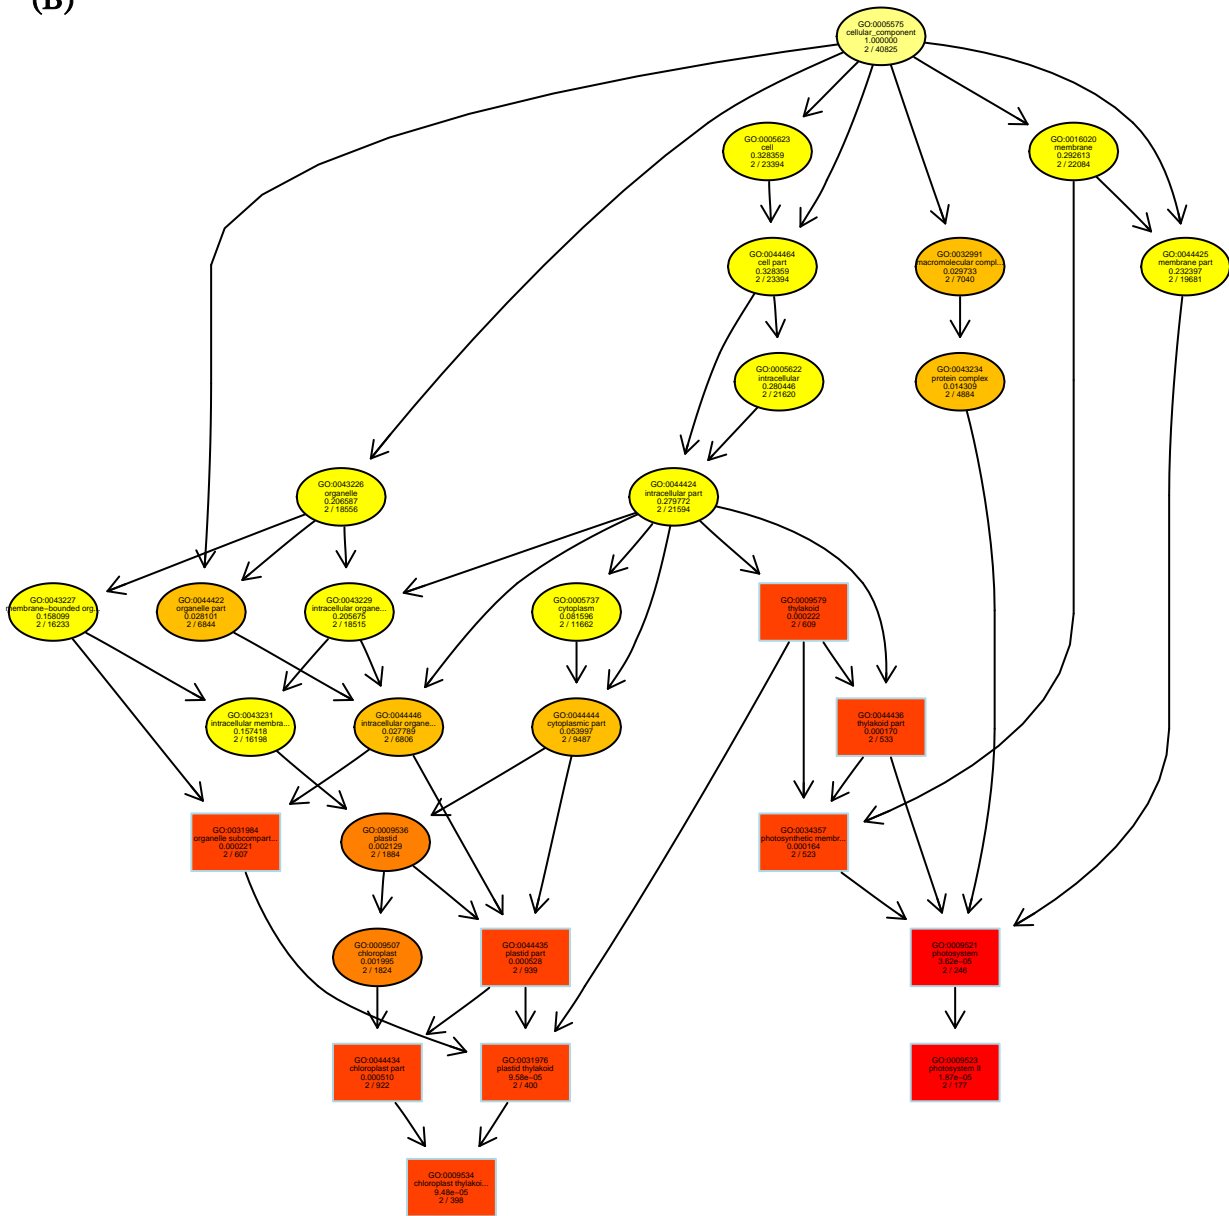

(C)

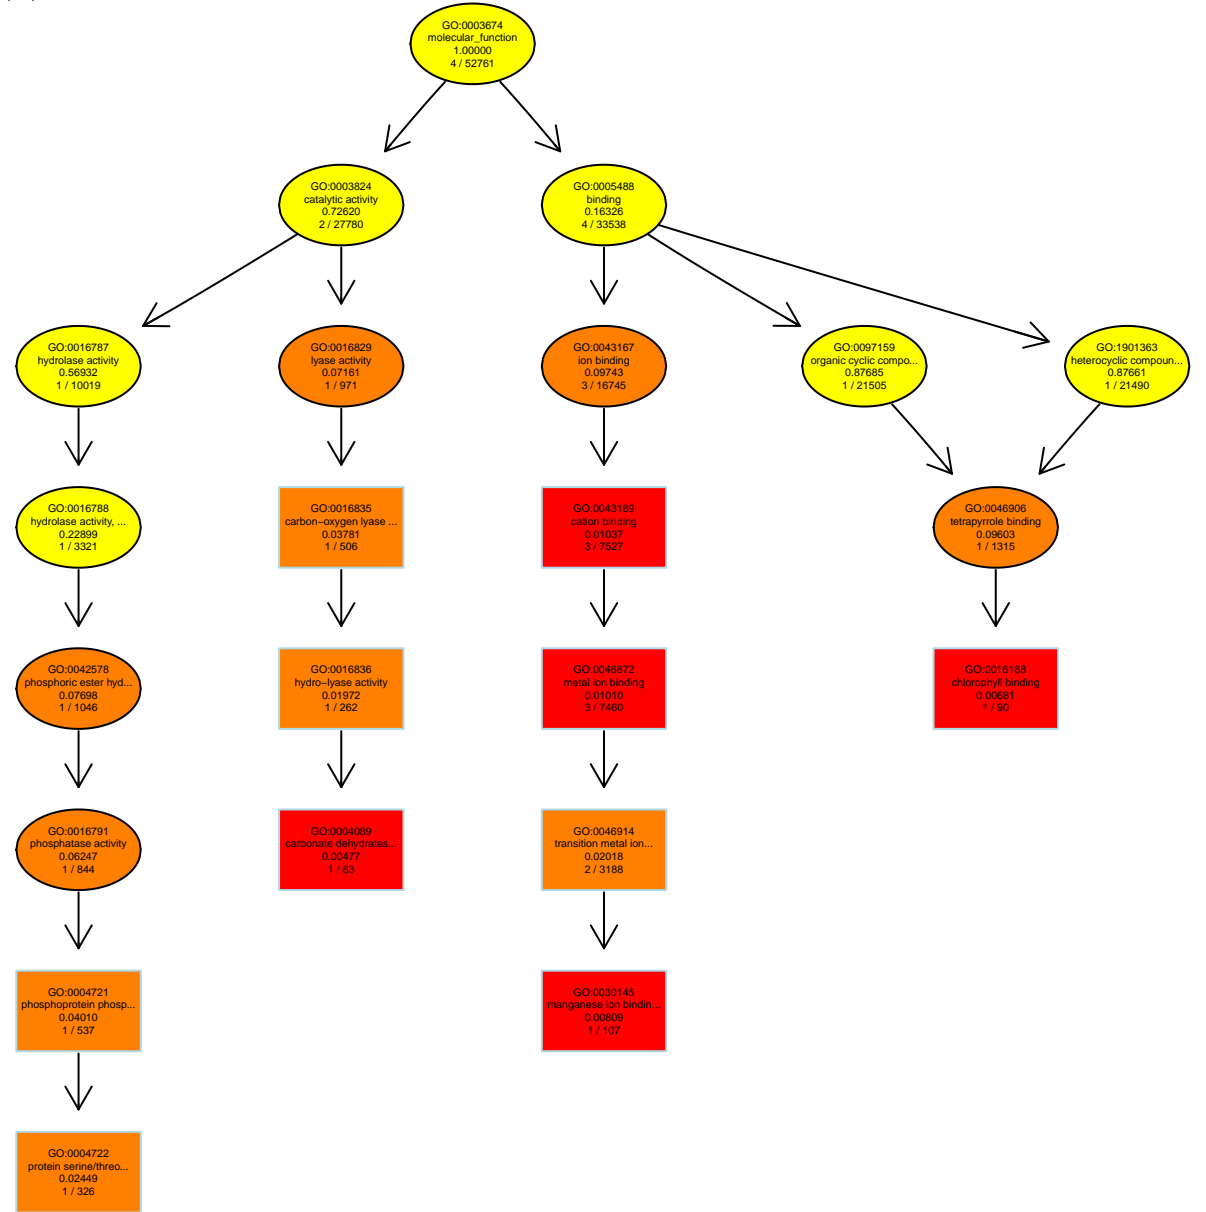

Supplement: s1 [file s1]
